1 **TITLE**

2 Models for infantile hypertrophic pyloric stenosis development in patients with esophageal atresia

3

4 **Authors and affiliations**

5 Chantal A. ten Kate<sup>1</sup>, Rutger W.W. Brouwer<sup>2</sup>, Yolande van Bever<sup>3</sup>, Vera K. Martens<sup>3</sup>, Tom Brands<sup>3</sup>,  
6 Nicole W.G. van Beelen<sup>1</sup>, Alice S. Brooks<sup>3</sup>, Daphne Huigh<sup>3</sup>, Bert J.F.M.M. Eussen<sup>3</sup>, Wilfred F.J. van  
7 IJcken<sup>2</sup>, Hanneke IJsselstijn<sup>1</sup>, Dick Tibboel<sup>1</sup>, Rene M.H. Wijnen<sup>1</sup>, Annelies de Klein<sup>3</sup>, Robert M.W.  
8 Hofstra<sup>3</sup>, Erwin Brosens<sup>3,#</sup>

9

10 <sup>1</sup>Department of Pediatric Surgery and Intensive Care Children, Erasmus MC University Medical  
11 Center - Sophia Children's Hospital, Rotterdam, The Netherlands

12 <sup>2</sup>Center for Biomics, Erasmus MC University Medical Center, Rotterdam, The Netherlands

13 <sup>3</sup>Department of Clinical Genetics, Erasmus MC University Medical Center, Rotterdam, The  
14 Netherlands

15

16 **Corresponding Author:**

17 # E. Brosens, PhD

18 Erasmus Medical Centre – Sophia Children's Hospital

19 Room Ee-987e

20 P.O. Box 2040

21 3000 CA Rotterdam

22 Tel +31 10 70 37643

23 Fax: +31 10 70 44736

24 [e.brosens@erasmusmc.nl](mailto:e.brosens@erasmusmc.nl)

25 ORCID ID: <https://orcid.org/0000-0001-8235-4010>

26

27 **Running title:** EA and IHPS: proposal for multifactorial hypothesis

28 **Keywords:** esophageal atresia, tracheoesophageal fistula, pyloric stenosis, VACTERL

29

30 **Summary statement:**

31 Instead of one affected gene, the higher incidence of IHPS in EA patients is more likely the result of  
32 multiple (epi)genetic and environmental factors together shifting the balance to disease  
33 development.

34 **ABSTRACT**

35 Patients born with esophageal atresia (EA) have a 30 times higher prevalence of infantile  
36 hypertrophic pyloric stenosis (IHPS). This makes sense from a developmental perspective as both the  
37 esophagus and the pyloric sphincter are foregut derived structures. EA and IHPS are variable features  
38 in several (monogenetic) syndromes. This, and twin and familial studies, indicates a genetic  
39 component for both conditions as single entities. We hypothesized that genetic defects, disturbing  
40 foregut morphogenesis, are responsible for this combination of malformations. Non-genetic factors  
41 could also contribute, as mice exposed to Adriamycin develop EA and *in utero* diethylstilbestrol  
42 exposure is associated with EA.

43 We investigated the copy number profiles and protein coding variants of 15 patients with both EA  
44 and IHPS. As all parents were unaffected, we first considered dominant (*de novo*) or recessive  
45 inheritance models but could not identify putatively deleterious mutations or recessive variants. We  
46 did identify inherited variants in genes either known to be involved in EA or IHPS or important in  
47 foregut morphogenesis in all patients. Unfortunately, variant burden analysis did not show a  
48 significant difference with unaffected controls. However, the IHPS associated risk SNP rs1933683 had  
49 a significantly higher incidence (OR 3.29, p=0.009).

50 Although the genetic variation in likely candidate genes as well as the predisposing locus near  
51 *BARX1* (rs1933683) suggest a genetic component, it does not fully explain the abnormalities seen in  
52 these patients. Therefore, we hypothesize that a combination of high impact genetic, mechanical and  
53 environmental factors together can shift the balance to abnormal development.

## 54 INTRODUCTION

55 Esophageal atresia (EA) is a rare congenital malformation caused by a faulty development of the  
56 foregut which leads to a discontinuity of the esophagus. It occurs in about 2.5 cases per 10,000 births  
57 within Europe (Pedersen et al., 2012, Oddsberg et al., 2012) and over three-quarters of patients  
58 present with a tracheoesophageal fistula (TEF) (Pedersen et al., 2012, Macchini et al., 2017). EA is  
59 considered – etiologically as well as phenotypically – a highly heterogeneous condition (Brosens et  
60 al., 2014). It can present either as an isolated defect but is often seen in combination with other  
61 malformations. Frequently, these malformations are part of the VACTERL (Vertebral, Anorectal,  
62 Cardiac, Tracheoesophageal, Renal or urinary tract of Limb malformations) association. VACTERL  
63 association is a diagnosis of exclusion in which three or more features of the VACTERL spectrum are  
64 present and a known genetic syndrome is not identified (Solomon et al., 2012). However, clustering  
65 of one or more of these features with additional specific associated malformations could also be the  
66 results of a shared genetic etiology.

67 One of the more prevalent, but less well-known, associated malformations is Infantile  
68 Hypertrophic Pyloric Stenosis (IHPS) (Rollins et al., 1989). In contrast to EA, IHPS is often considered  
69 an acquired disorder. The pyloric muscle hypertrophies in the first weeks of life, causing a narrowing  
70 of the pyloric channel (Panteli, 2009). Healthy-born infants present at week 3 to 6 of life with  
71 projectile postprandial vomiting. They need surgery where the upper layer of the circular smooth  
72 muscle of the pylorus will be incised, to release the passage from the stomach to the intestine again.

73 Previously, we described a 30 times higher prevalence (7.5%) of IHPS in patients with EA  
74 compared to the normal population (0.25%) (van Beelen et al., 2014). This increased prevalence has  
75 been reported in other retrospective studies (3.3-13%) as well (Palacios M.E.C. et al., 2014, Deurloo  
76 et al., 2002). The clinical presentation of IHPS seen in patients with EA/IHPS is not different from  
77 patients with isolated IHPS. However, the diagnosis of IHPS is more difficult and often delayed in  
78 patients with EA. Relatively common complications after EA repair, such as stenosis of the  
79 anastomosis, can protect against reflux and lead to just regurgitation. By the time these patients  
80 start vomiting, there must be massive gastroesophageal reflux.

81

82 The presentation of both EA and IHPS makes sense from a developmental perspective as the  
83 esophagus and the pyloric sphincter are both foregut derived structures. Organ specification during  
84 embryonic development is under tight spatiotemporal control of specific growth factors,  
85 transcription factors and signaling cascades (Li et al., 2009, Jacobs and Que, 2013). Disturbances in  
86 these pathways could impact proper development. In mice, the esophagus is specified from the  
87 foregut tube between embryonic day E9.5 and E11.5. In humans, the esophagus, as well as the

88 stomach, starts developing from the fourth week after conception onwards. The stomach turns  
89 around its anterior-posterior axis during embryonic development (Cetin et al., 2006). The developing  
90 pylorus can be visualized with immunostaining at week six after gestation and differentiates during  
91 fetal life (Koyuncu et al., 2009).

92 Environmental (Zwink et al., 2016, Felix et al., 2008, Feng et al., 2016, Markel et al., 2015, Krogh et  
93 al., 2012, Sorensen et al., 2002) and genetic contributions (Peeters et al., 2012, Brosens et al., 2014,  
94 Solomon et al., 2012) have been described for both EA and IHPS as single entities or in combination  
95 with other anatomical malformations. It has been suggested that *in utero* exposure to  
96 diethylstilbestrol (DES) is associated with the development of EA (Felix et al., 2007a). Moreover, both  
97 malformations are variable features in specific and often phenotypically overlapping genetic  
98 syndromes (Table 1). The presence of both conditions as variable features in the phenotypical  
99 spectrum of known genetic syndromes is indicative of a genetic background for EA and IHPS. More  
100 evidence for a genetic contribution can be deduced from twin studies and animal models (de Jong et  
101 al., 2010). The concordance rates in monozygotic twins compared to dizygotic twins is higher for EA  
102 (Veenma et al., 2012) and IHPS (Krogh et al., 2010) as single entities. Also, the recurrence risk is  
103 elevated for siblings and offspring of affected individuals with EA in combination with other  
104 associated anomalies (Robert et al., 1993, Van Staey et al., 1984, Warren et al., 1979, McMullen et  
105 al., 1996). In contrast, the recurrence risk for isolated EA is low (Schulz et al., 2012) and moderate for  
106 IHPS (Krogh et al., 2010, Elinoff et al., 2005). In contrast to EA, there has been reported a male  
107 predominance for IHPS (4:1) (MacMahon, 2006). There have been risk loci associated to IHPS  
108 (Everett and Chung, 2013, Feenstra et al., 2012, Feenstra et al., 2013, Svenningsson et al., 2012,  
109 Fadista et al., 2019). To date, no risk loci have been described for EA.

110

111 Considering the increased prevalence of IHPS in patients with EA, their common developmental  
112 origin and previous evidence in genetic studies, we hypothesized that Copy Number Variants (CNVs)  
113 or other protein coding alterations affecting one specific gene, or genetic disturbances in more genes  
114 all important for foregut morphogenesis are responsible for the higher incidence of IHPS in patients  
115 with EA.

116

117

## 118 **RESULTS**

### 119 *Patient cohort*

120 In total, 27 out of 664 patients (4.1%) born with EA between 1970-2017, developed IHPS. Twenty  
121 patients have been described previously (van Beelen et al., 2014). Parental informed consent for

122 whole exome sequencing (WES) was obtained for 15 patients. Several phenotypical characteristics  
123 stood out in this EA/IHPS cohort: a sacral dimple was present in seven patients (25.9%), anomalies of  
124 the vertebrae or ribs in eight patients (29.7%) and genitourinary anomalies in six patients (22.2%) of  
125 which two patients (7.4%) had hypospadias. Four patients (14.8%) had three or more anomalies  
126 within the VACTERL spectrum (Solomon, 2011). A full phenotypical description of the 27 EA/IHPS  
127 patients is given in Table 2.

128

### 129 *Copy Number analysis*

130 Our previous study described rare CNVs and their inheritance pattern in patients with EA (Brosens et  
131 al., 2016b), seventeen EA/IHPS patients were included in this previous study. None of the six large  
132 CNVs identified were *de novo*, all were inherited from one of the unaffected parents. Patient  
133 SKZ\_400 had a paternal inherited rare gain of chromosomal region 11q15. Patient SKZ\_0887 had  
134 maternal inherited putative deleterious gains on Xq26.1 and Xp22.33. Patient SKZ\_1003 had a  
135 maternal inherited loss of chromosomal region 17q11 and patient SKZ\_1248 maternal inherited rare  
136 gains in chromosomal regions 4q35 and 5p15.1. Additional exon-level CN-profiling using the  
137 normalized coverage profiles (Amarasinghe et al., 2013) of the exome sequencing data confirmed the  
138 presence of the CNV seen with SNP-array. All CN profiles of main EA and IHPS disease genes (Brosens  
139 et al., 2014, Peeters et al., 2012) were normal. There were no overlapping rare CNVs in this patient  
140 cohort. All rare CNVs, classified as VUS or (likely) deleterious are described in Table S1.

141

### 142 *Exome sequence analysis*

143 Sequencing resulted in at least 5 Giga-bases of raw sequence data with an average coverage of 70X  
144 and 90% of target bases covered over 20X. Quality of the sequence data is listed in Table S2. As none  
145 of the parents of the 15 investigated patients were affected we first considered dominant *de novo*  
146 and recessive modes of inheritance.

147 We could not identify *de novo* pathogenic variation in main EA and IHPS disease genes (Brosens et  
148 al., 2014, Peeters et al., 2012). Subsequently, we searched for possible *de novo* mutations exome  
149 wide. For this, we focused on putative deleterious ultra-rare protein coding or splice site variants  
150 (n=100) (Bennett et al., 2017). Variations were considered ultra-rare when they were absent in the  
151 gnomAD dataset (123,136 whole exomes and 15,496 whole genomes)  
152 (<http://gnomad.broadinstitute.org/>) (Lek et al., 2016). Twenty-five variants proved to be sequencing  
153 artifacts. Furthermore, we could not confirm the segregation of 15 mutations due to lack of parental  
154 DNA. We determined the segregation of all ultra-rare variants predicted to be of unknown  
155 significance (VUS, n=37) or (likely) deleterious (n=23). All putative deleterious variants tested proved  
156 to be inherited from one of the unaffected parents.

157 Considering a recessive mode of inheritance, we searched for genes with homozygous or  
158 compound heterozygous variants. Six variants in three genes (*FLNC*, *ATP6V0A1* and *FAM46A*) fitted a  
159 putative compound heterozygous model, two genes (*KCNN3* and *VDAC3*) had homozygous variants  
160 and two genes (*MID2* and *SH3KBP1*) had variants on chromosome X in a male patient. All variants  
161 were predicted to be likely deleterious or VUS and intolerant to missense variants (Z-score  $\geq 3$ ) or loss  
162 of function variants (PLI or PLIrec  $\geq 0.9$ ). With segregation analysis, we could confirm the compound  
163 heterozygous mode of inheritance of the variant in the *FAM46A* gene in patient SKZ\_2023 and the  
164 maternally inherited X-linked variant in the *SH3KBP1* gene in patient SKZ\_1260. The other recessive  
165 candidate genes could not be validated due to technical difficulties (and are likely sequencing  
166 artifacts) or due to lack of parental DNA. None of the recessive candidate genes were affected twice  
167 or more in this cohort. All predicted deleterious variants were submitted to the ClinVar database  
168 <https://www.ncbi.nlm.nih.gov/clinvar/> (Landrum et al., 2014).

169 We inspected the CN profiles from WES-CN and SNP-array for partial overlap with genes affected  
170 by heterozygous variant predicted to be deleterious in (recessive) loss of function intolerant or  
171 missense intolerant genes (n=48) and could not detect unmasking of a recessive mutation by a CNV.  
172 Ultra-rare variants (n=78), X-linked or recessive variants are depicted in Table S4 and uploaded to the  
173 ClinVar database (<https://www.ncbi.nlm.nih.gov/clinvar/>)

174

#### 175 *Pathway enrichment analysis of genes affected by rare variants*

176 When looking at the selected protein altering variants (Z-score  $\geq 3$ , n=44) or loss of function  
177 intolerant (PLI  $\geq 0.9$ , n=4), two relevant pathways were significantly enriched (p-value  $< 1 \times 10^{-5}$ ):  
178 proliferation and differentiation of smooth muscle cells (*INSR*, *ITGB1*, *NOTCH1*, *TCF4*, *PDE4D*, *TERT*,  
179 *ANKRD17*, *DICER1*) and self-renewal of satellite cells (*ITGB1*, *NOTCH1*).

180

#### 181 *Variant prioritization using different in silico tools*

182 We prioritized all rare variants with three in silico tools (see Methods section). Fifty-four variants in  
183 34 genes had an overlap between VAAST (Yandell et al., 2011, Hu et al., 2013, Kennedy et al., 2014)),  
184 which prioritizes based on variant deleteriousness and Phevor and PhenIX which prioritize more on  
185 phenotype (Singleton et al., 2014, Zemojtel et al., 2014)). Top ranking variants can be found in Table  
186 S3.

187 Additionally, we found variants in the same gene in multiple patients (Fig. 1). Of these 116 genes  
188 (VUS=87, likely deleterious=30), 36 genes were found in  $\geq 3$  patients of which six genes were present  
189 in more than five patients (*CNTN2*, *DSPP*, *NOTCH4*, *PRRC2A*, *SEC16B*, *ZNF717*). Four (*AMBRA1*,  
190 *ATP2A3*, *DSCAM*, *NOTCH1*) out of 116 genes were predicted to be intolerant for missense variants (Z-  
191 score  $\geq 3$ ). See also Table S4.

192

### 193 *Gene burden analysis*

194 An exome wide gene burden analysis showed ten genes which were enriched for rare putatively  
195 deleterious variation compared to the 1000 Genomes project phase 3 samples. The results are  
196 shown in Table 3. There were no genes with more than two distinct variants. Each variant was  
197 observed only once. A second burden test – only evaluating genes from developmental important  
198 pathways and known disease genes – showed no significant difference between our 15 patients and  
199 a control group of 44 healthy individuals, who were sequenced in a previous study (Table 4). Also,  
200 the number of putative deleterious variants between these two groups was not significantly different  
201 (Table 5). Unfortunately, a burden test comparing the variant profiles of these genes between the  
202 patients and their parents was not possible since no WES data of the parents was available.

### 203 *Expression of main candidate gene during development*

204 With public micro-array transcriptome data we evaluated which genes were upregulated at a specific  
205 time-point in the foregut, esophagus or pyloric sphincter and used the output as an indicator of gene  
206 expression (see Methods section and Table S5). Of the genes classified as VUS or likely deleterious in  
207 our exome sequencing results, 28 genes were upregulated in both the foregut or esophagus as well  
208 as the pyloric sphincter: *ADAMTSL4*, *AGRN*, *ANKRD29*, *ARHGAP29*, *CAMTA1*, *CDHR5*, *CNTN2*,  
209 *COL11A1*, *DNAJC11*, *HIVEP3*, *HMCN1*, *HMGCS2*, *HSPG2*, *ITGB3BP*, *LDB3*, *MYOF*, *NKX2-3*, *NUP133*,  
210 *PCSK9*, *PKN2*, *PRDM16*, *PUM1*, *RET*, *SEC16B*, *SERINC2*, *TMEM82*, *VPS13D* and *ZBTB7B*.

211 Unfortunately, none of the genes enriched in our burden analysis were differentially expressed in  
212 mice foregut between E8.5 and E16.5. Seven out of 116 genes with putative deleterious variants in  
213 more than one patient were differentially expressed in mice foregut: *Adamtsl4* at E8.5, E14.5 and  
214 E16.5; *Ankrd26* at E14.5; *Cntn2* at E8.5, E15.5 and E18.5; *Hspg2* at E8.25, E8.5, E14.5 and E18.5;  
215 *Kcnn3* at E8.5 and E15.5; *Ldb3* at E8.5, E14.5 and E15.5; *Sec16b* at E8.5, E14.5 and E16.5. Of the top  
216 candidate genes in the manual burden analysis (see Table 4 and Table S6) only *Ret* was differentially  
217 expressed in mice at E8.25, E8.5, E11.5, E14.5, E15.5, E16.5 and E18.5.

218

### 219 *Detection of common SNPs associated with IHPS*

220 Determination of the risk allele frequency of four loci highly associated with IHPS (rs11712066,  
221 rs573872, rs29784 and rs1933683 near genes *MBNL1*, *NKX2-5* and *BARX1*, respectively) revealed a  
222 significantly higher incidence of rs1933683 in our EA/IHPS cohort compared to the population  
223 frequency (OR 3.29 (95% CI 1.27-8.56), p=0.009, see Table S7). The risk allele frequency of the other  
224 risk loci was not significantly different from the normal population. We did not detect rare putatively  
225 deleterious variants in *MBNL1*, *NKX2-5* and *BARX1* in the patient exome sequencing data.

## 226 DISCUSSION

227 We hypothesized that the increased prevalence of IHPS in patients with EA compared to the  
228 prevalence of IHPS in the normal population was due to shared CNVs or protein coding alterations in  
229 a specific gene, or due to genetic disturbances in genes of shared biological networks during  
230 development. As mentioned earlier, both EA and IHPS are variable features in specific genetic  
231 syndromes (Table 1). Therefore, to find genetic aberrations that contribute to EA/IHPS we initially  
232 searched for pathogenic alterations in known EA or IHPS associated genes (Table S6).

233

234 *There are no pathogenic changes in known disease genes*

235 As all parents were unaffected, we started this study by focusing on *de novo*, recessive or X-linked  
236 changes affecting these known disease genes. However, we could not identify deleterious protein  
237 coding alterations, exonic gains or losses or larger CNVs affecting these genes. This is in line with  
238 previous studies in which limited causal changes could be detected in patients with EA and  
239 associated anomalies (Zhang et al., 2017, Hilger et al., 2015, Brosens et al., 2016b)

240 Next, we extended our analysis to all genes covered in the exome capture. Given the small sample  
241 size (n=15), the low prevalence of the disorder and the high impact on development, we  
242 concentrated on genes intolerant to variation (Lek et al., 2016, Ruderfer et al., 2016) harboring rare  
243 putative deleterious single nucleotide changes or large CNVs. Moreover, we determined the  
244 segregation of alterations in these candidate genes, putative recessive (X-linked, compound  
245 heterozygous and homozygous recessive) and all ultra-rare protein altering changes absent from the  
246 gnomAD database (Lek et al., 2016) as the later have a high chance of being *de novo* (Bennett et al.,  
247 2017). Unfortunately, we did not identify any *de novo* mutations or *de novo* CNVs. None of the  
248 identified inherited rare CNVs overlapped in these patients. We could confirm the presence of a  
249 compound heterozygous variant in *FAM46A* in one patient and an X-linked variant in *SH3KBP1* in  
250 another patient. However, *FAM46A* and *SH3KBP1* are not known to be associated with the  
251 gastrointestinal or respiratory tract and were not differentially expressed at the time points  
252 important for foregut morphogenesis. These findings made us conclude that neither a dominant nor  
253 a recessive model can explain the combination of EA and IHPS in these patients.

254

255 *The coding sequences of genes crucial in esophageal and pyloric sphincter formation are affected*

256 Subsequently, we focused on genes involved in foregut development. Literature research together  
257 with data of previous expression studies provided an overview of genes important for foregut  
258 development (Fig. 2).



259 The development of the foregut is most studied in mouse models. In mice, early foregut  
260 formation starts with *Foxa2* stimulation of the anterior endoderm at E8.0 (Heath, 2010). The  
261 endodermal sheet folds and forms a tube at E8.75 (Sherwood et al., 2009). Next, signals from the  
262 notochord start dorsal-ventral patterning around E9.0, with high *Nkx2.1*/absent *Sox2* in the ventral  
263 future trachea and absent *Nkx2.1*/high *Sox2* in the dorsal future esophagus and stomach (Que et al.,  
264 2007). These dorsal-ventral patterns lead to compartmentalization of the foregut. Between E9.5 and  
265 E11.5 the foregut separates in the primordial esophagus and stomach, and in the primordial trachea.  
266 Primordial lung buds become apparent at E9.5 (Sherwood et al., 2009). The separation site is marked  
267 by mesenchymal expression of *Barx1* (Woo et al., 2011). The esophagus is completely separated from  
268 the trachea at E11.5.

269 Pyloric sphincter formation is mostly studied in chick and mouse models. This formation starts  
270 with the thickening of the circular smooth muscle layer between the antrum and the duodenum  
271 around E14.5 and the primordial pyloric sphincter is complete around E18.5 (Smith et al., 2000a, Self  
272 et al., 2009). In addition to its functioning in foregut separation, the *Barx1* homeobox gene is also  
273 vital for stomach differentiation and stomach smooth muscle development. It inhibits *Wnt* signaling  
274 (Woo et al., 2011) and modulates the expression of *Bapx1*, another important factor required for  
275 pyloric sphincter morphogenesis (Jayewickreme and Shivdasani, 2015, Stringer et al., 2008, Verzi et  
276 al., 2009).

277  
278 Given the described importance of these genes in normal development, we hypothesized that  
279 variations in multiple genes important for foregut morphogenesis might explain the higher incidence  
280 of IHPS in patients with EA. We compared a selection of genes – known to be important for foregut  
281 morphogenesis or syndromatically associated with EA or IHPS – between the patients and the  
282 healthy controls (Table 4, Table S6). Interestingly, in *TNXB* (NM\_019105.6:c.4444G>A,  
283 p.Val1482Met), *WDR11* (NM\_018117.11:c.1138G>T, p.Val380Phe), *PEX3* (NM\_003630.2:c.1012A>G,  
284 p.Ser338Gly), *TBX3* (NM\_016569.3:c.506G>A, p.Arg169Gln), and *GDF6* (NM\_001001557.2:c.281C>G,  
285 p.Pro94Arg) rare variants were present that were absent in the control group. These variants might  
286 not be sufficient to result in disease but are predicted to impact the protein and might contribute  
287 together with other unknown factors to disease development.

288  
289 *There is no high frequency burden of rare variants*

290 Given the limited number of samples, we will only detect a gene burden if it is large and has a high  
291 impact. We compared the total rare and ultra-rare variant burden of putative deleterious variants in  
292 all genes. The number of ultra-rare variants was slightly higher in the patient group compared to the  
293 control group but did not differ significantly (Table 5). A second burden analysis identified ten genes

294 with more variants compared to those seen in the 1000 Genome cohort, two variants were predicted  
295 to be deleterious (Table 3). Unfortunately, they did not show any overlap with the results of the  
296 expression analysis or candidate genes selected from the literature. Therefore, these variants are not  
297 likely to explain the increased incidence of IHPS in EA patients or EA/IHPS development. A rare  
298 variant burden might exist but we could not detect it due to limited sample size and/or focus on  
299 known candidate genes.

300

301 Of all the protein coding changes classified as VUS or higher (Table S4; Table S8), 116 genes were  
302 affected with a variant in more than one patient (Fig. 1). Seven of these genes (*ADAMTSL4*,  
303 *ANKRD26*, *CNTN2*, *HSPG2*, *KCNN3*, *LDB3*, *SEC16B*) were differentially expressed in the developing  
304 foregut, esophagus or pyloric sphincter in mice between E8.25 and E16.5. However, none of these  
305 genes could explain the combination of EA and IHPS within a patient based on their function; none of  
306 these genes is known to be associated with the gastrointestinal or respiratory tract. Furthermore,  
307 most variants had a population frequency above the prevalence of EA/TEF. If these variants are  
308 highly penetrant, they would not be the likely cause. Increasing sample sizes (drastically) would allow  
309 an analysis going beyond known intolerant genes, allow us to consider reduced penetrance and  
310 potentially identify a shared genetic etiology.

311

312 *Known common variants associated with IHPS development could have an impact in some patients*

313 Since certain SNPs have been identified with GWAS to be highly associated with IHPS, we wondered  
314 if these known common haplotypes could also play a role in the higher incidence of IHPS in patients  
315 with EA. In our cohort, we found a significantly higher incidence of the risk loci rs1933683 compared  
316 to the population frequency (Table S7). Three patients were homozygous for the risk allele and have  
317 a substantially increased risk for IHPS development. The common risk haplotype might therefore  
318 impact IHPS development in some of the IHPS patients. However, further research is needed to  
319 confirm the impact of this haplotype in a larger EA and EA/IHPS population.

320 *Possible contribution of non-genetic factors*

321 All the data presented so far made us conclude that dominant *de novo* variations in possible disease  
322 causing genes do not play a role in our cohort. Recessive inheritance cannot totally be excluded,  
323 although our results are not suggestive for this mode of inheritance. We did identify in all patients  
324 putative disease-causing variants. Nevertheless, as all parents from whom these variants were  
325 inherited were not affected, these variants could contribute but not cause the disease. Previous  
326 studies suggested the contribution of non-genetic factors as an explanation for the combined  
327 occurrence of EA and IHPS.

328 *Could IHPS be an acquired condition related to surgery or treatment of EA?*

329 The overrepresentation of IHPS in EA patients made us wonder if IHPS could also be the result of the  
330 atresia itself, potentially as a result of the surgical procedure to correct the atresia or the result of  
331 treatment. Previous studies also mentioned vagal nerve lesions, a gastrostomy and transpyloric  
332 feeding tubes as possible causes for an increased incidence of IHPS after correction of EA (Ilhan et al.,  
333 2018). IHPS has been suggested to be a neuromuscular disorder with the involvement of smooth  
334 muscle cells, interstitial cells of Cajal and the enteric nervous system. The hypertrophy is suggested  
335 to be the result of discoordinated movements of the pyloric sphincter and the contractions of the  
336 stomach (Hayes and Goldenberg, 1957), perhaps as the result of absent nitric oxide synthase activity  
337 (Vanderwinden et al., 1992). Impaired gastric contractility and esophageal relaxation were observed  
338 in Adriamycin and doxorubicin induced EA in mice (Tugay et al., 2003, Tugay et al., 2001).  
339 Mechanistically, this association between EA and IHPS seems plausible. However, it does not explain  
340 why IHPS is not fully penetrant in patients with EA. The most common thought is that mechanical  
341 and environmental factors disturb the developmental field. To which extent these factors influence  
342 the development of the child, depends on the specific risk factors and their timing. Further research  
343 on the cause and other specific clinical risk factors for patients with EA should be considered, e.g. the  
344 late start of oral feeding or the long-term feeding through a tube instead of drinking themselves.

345

346 *Models for EA/IHPS disease etiology*

347 Since we hypothesized that genetic defects, disturbing foregut morphogenesis, would be responsible  
348 for the combination of EA/IHPS, we started with the thought of a (monogenetic) syndromic model.  
349 However, we have not been able to find a central gene impacted in most patients which can explain  
350 the increased prevalence of IHPS in patients with EA. An as yet unknown syndrome is unlikely since  
351 we have not found *de novo* (as all parents are unaffected) or shared high impact variants in the same  
352 gene multiple patients. However, we cannot exclude *de novo* mutations which have been seen in the  
353 GnomAD exomes or genomes, nor did we look beyond the coding part of our genome.

354 Furthermore, we have detected inherited rare variants in candidate genes and genes affected  
355 more than once by variants with a low (unaffected) population frequency. Therefore, we cannot  
356 exclude a genetic component. Another option is that, although the combination of EA and IHPS could  
357 not be explained by one gene or locus, the underlying cause of EA and the other associated  
358 anomalies is the result of hits in multiple genes. About 10% of the patients with EA have an  
359 underlying genetic syndrome (Brosens et al., 2014) and more can be expected. The phenotypical  
360 spectrum of this cohort is very heterogeneous and could be the result of impacts on multiple genes.  
361 IHPS could then independently be caused by mechanical factors such as the surgical procedure.

362

363 Furthermore, environmental risk factors have been suggested for EA and IHPS, like pesticides,  
364 smoking, herbicides and periconceptional alcohol or multivitamin use (Zwink et al., 2016, Felix et al.,  
365 2008, Feng et al., 2016, Markel et al., 2015, Krogh et al., 2012, Sorensen et al., 2002). Considering the  
366 absence of highly penetrant recurring genetic variations, we now hypothesize different multifactorial  
367 models for disease development. In all these models the combination of CNVs, deleterious protein  
368 alterations (Felix et al., 2007b, Brosens et al., 2014), severe changes in the developmental field  
369 during the organogenesis (Martinez-Frias, 1994, Martinez-Frias and Frias, 1997) and/or  
370 environmental inducing epigenetic changes (Sorensen et al., 2002) together can modulate the  
371 phenotypical spectrum seen in these patients. Examples of possible mechanical and environmental  
372 factors disturbing the developmental field are mice models with Adriamycin induction or dorsal-  
373 ventral patterning signals from the notochord.

374

375 Our first hypothesis is based on the earlier published theory of Brosens et al. about disturbed ENS  
376 development (Brosens et al., 2016a). It includes a seesaw model in which risk factors are in balance  
377 with protective mechanisms. In this model, the fulcrum can be shifted by a genetic variation in a  
378 central gene, which automatically disrupts the balance. When applying this theory on EA/IHPS  
379 patients, this would lead to more or less affected organ systems within the VACTERL syndrome.  
380 However, in this study we have not been able to detect one central gene. This makes a seesaw model  
381 with a variable fulcrum less likely as an explanation for the increased prevalence of IHPS in the EA  
382 population.

383

384 A second hypothesis is a burden model (Fig. 3A). Similar, (epi)genetic, environmental and mechanical  
385 factors form a burden of risk factors, which balances with protective mechanisms. In this model, the  
386 point of balance is not shifted by a mutation in a central gene and every person has contributions of  
387 certain risk factors. But in most cases this does not lead to affected organ systems. There is an  
388 intermediate range between normal and affected in which individuals can have the genetic burden  
389 but lacks an abnormal phenotype (reduced penetrance) or their symptoms differ in severity (variable  
390 expressivity). The latter would fit the results in this study; maybe we did have detected variants but  
391 have we failed to interpret them correctly as parents were seemingly unaffected and/or the variant  
392 frequency can be higher in unaffected controls to be of relevance in patients. Mechanical or  
393 environmental factors could have made the difference in shifting the balance. All together the  
394 burden model is a plausible explanation for the disease development.

395

396 Last, we hypothesize a slippery slope model (Fig. 3B). In this model, the burden of low impact genetic  
397 variants and environmental disturbances alone does not impact the balance seen in the seesaw

398 model unless it crosses a certain threshold. Moreover, we hypothesize that the protective  
399 mechanisms (e.g. compensatory mechanisms) during development are very strong, making it really  
400 difficult to shift the balance. Most fetuses do not develop any malformations despite the combined  
401 genetic and environmental burden or do not survive. But once the threshold is reached, the balance  
402 is immediately greatly disrupted and often multiple organ systems are affected. This model fits with  
403 the phenotypical results in this study since four patients (14.8%) had three or more anomalies within  
404 the VACTERL spectrum. In this model there is a high tolerance for low impact genetic variation and  
405 only high impact variation (aneuploidies, exposure to toxic substances, pathogenic changes in  
406 developmental crucial genes) shifts the balance. When the balance is disturbed, it shifts drastically.  
407 We did not detect high impact changes responsible for the EA/IHPS combination. As parents are  
408 unaffected it is (in this model) unlikely that inherited variants impact disease development, nor  
409 would variants which are seen in the (unaffected) population controls.

410

#### 411 *Limitations*

412 Not finding any positive correlation between DNA variations in specific genes or developmental  
413 pathways is partly due to the small data set we have (15 patients). The small sample size is no  
414 problem for the *de novo* and our recessive model strategy in known disease genes, but it is so for the  
415 heterozygous variant burden analysis. Another limitation is the lack of data on the expression of  
416 genes involved in normal foregut development in human embryos. Our gene selection was based on  
417 mouse transcriptome data. Little human data is available since human embryos of 4 to 6 weeks old  
418 are generally not preserved. However, although it is unclear how precisely the foregut development  
419 in mice corresponds with humans, it is unlikely that this is very different in its early phases. Finally,  
420 one could argue that variations in the non-coding part of the genome are major contributors.  
421 Although we did investigate known IHPS risk loci and determined genome wide CNV profiles, we did  
422 not determine genome wide variation.

423

#### 424 *Conclusions*

425 To conclude, *de novo* mutations (a dominant model) and homozygous or compound heterozygous  
426 mutations (a recessive model) in the protein coding part of the genome are not a likely cause for the  
427 combination of EA and IHPS. Although the presence of genetic variation in likely candidate genes  
428 suggests a genetic component, there does not seem to be an enrichment of genetic variants in good  
429 candidate genes in patients. There are putative deleterious variants in foregut or disease genes  
430 which might contribute to disease development and although there is no difference in burden, some  
431 variants might contribute more than others and this is not taken into account in a burden test. We

432 might have misinterpreted the impact of some of the inherited variants. Furthermore, in some  
433 patients the IHPS predisposing locus rs1933683 is present.

434 We hypothesized several multifactorial models in which the combination of multiple high impact  
435 genetic, mechanical and environmental factors together can shift the balance from normal to  
436 abnormal development. A burden model with reduced penetrance or variable expressivity is most  
437 likely if genetic factors contribute. Future research should investigate the incidence of IHPS in bigger  
438 EA patients cohorts to further explore this theory. To exclude the role of treatment or surgery,  
439 clinical factors related to the surgical correction of EA – for example vagal nerve lesions after surgery,  
440 the late start of oral feeding or transpyloric feeding tubes – should be systematically registered.

441

442

## 443 **MATERIAL AND METHODS**

### 444 *Patient cohort*

445 This study was approved by the Medical Ethical Review Board of Erasmus MC - Sophia Children's  
446 Hospital (MEC 193.948/2000/159). We searched the Erasmus University MC-Sophia EA-cohort and  
447 the database of the standardized prospective longitudinal follow up program in our hospital for  
448 children with congenital anatomical anomalies (Gischler et al., 2009) for patients born between  
449 1970-2017 with a combination of both EA and IHPS in history. Patients were included and analyzed  
450 after parental informed consent

451

### 452 *SNP-array analysis*

453 Micro-array analysis was performed using the single-nucleotide polymorphism (SNP) CytoSNP-  
454 850Kv0 BeadChip (Illumina Inc., San Diego) using standard protocols and the GenomeStudio  
455 genotyping module (v1.9.4, [www.illumina.com](http://www.illumina.com)). Visualization of Copy Number Variations (CNVs),  
456 Runs of Homozygosity (ROH) and comparisons to in-house control cohorts as well as published  
457 cohorts of affected and control individuals was done using Biodiscovery Nexus CN7.5. (Biodiscovery  
458 Inc., Hawthorne, CA, USA) and described previously (Brosens et al., 2016b).

459

### 460 *Variant pre-filtering and prioritization*

461 The initial variant filtering method has been described previously (Halim et al., 2017). In brief, we  
462 included all variants with an allele frequency below 1% in 1000 Genomes phase 3 version 5, Exome  
463 Variant Server 6500 v0.0.30, Genome of the Netherlands (Genome of the Netherlands, 2014), ExAC  
464 0.3 and our in-house cohort (n=906), consisting of individuals captured with the SureSelect Human  
465 All Exon 50 Mb Targeted exome enrichment kit v4 (n=279), SureSelect Clinical Research Exome v1

466 (n=387) and Haloplex Exome target enrichment system (n=240), Agilent Technologies, Inc., Santa  
467 Clara, California).

468 All nonsense variants, variants predicted to affect splicing and all variants with a Combined  
469 Annotation-Dependent Depletion (CADD) score (Kircher et al., 2014) above 20 were selected for  
470 individual patient analysis in downstream tools. Different downstream tools were used to prioritize  
471 the variants. Prioritized variants were further classified according to the criteria in Table S8.  
472 Determination of variant segregation and confirmation of *de novo* of inherited status of variants was  
473 done with Sanger sequencing unless otherwise indicated.

474

#### 475 *Variant burden test and prioritization using Opal*

476 We used the Variant Annotation, Analysis & Search Tool (VAAST) (Yandell et al., 2011, Hu et al., 2013,  
477 Kennedy et al., 2014) cohort analysis embedded in Opal 4.29.5 (Fabric Genomics, Oakland, CA, USA)  
478 to rank the variants in the individual patients. Secondly, we performed a burden test on the full  
479 exomes using Exome Variant Server 6500 v0.0.30 and 1000 Genomes phase 3 version 5 as a control  
480 cohort. We used a 1% allele frequency cut-off for recessive (hemizygous and homozygous) variants  
481 and 0.1% cut-off for heterozygous variants. Compound heterozygosity was not considered in this  
482 analysis as we did not know the phase of the haplotypes. Only putative protein changing (nonsense,  
483 missense, initiator codon variants, in-frame indels, splice sites and splice regions) variants were taken  
484 into account. Since we were only interested in putative deleterious variants we used an Omicia score  
485 of 0.79 as a threshold as this cut-off has a false positive rate of 5%. Omicia is an algorithm included in  
486 the Opal software that combines SIFT (Ng and Henikoff, 2001), PolyPhen (Adzhubei et al., 2010),  
487 MutationTaster (Schwarz et al., 2010) and PhyloP (Siepel et al., 2005) to predict deleteriousness of  
488 variants.

489 For the VAAST burden test we used a minimum significance of 0.05 and a gene had to have at  
490 least two distinct variants in the case set. These genes were used as a gene panel in the individual  
491 patient analysis. Individual variants were prioritized before individual inspection as follows. First, all  
492 recessive (X-linked and putative homozygous and compound heterozygous), putative rare (MAF  
493  $\leq 0.001\%$ ) and damaging *de novo* variants were selected. Secondly, the top 10 of variants ranked by  
494 the VAAST 1.1 prioritization algorithm and subsequently the top 10 variants re-ranked by the Phevor  
495 algorithm (Singleton et al., 2014) were included. We used the Human Phenotype Ontology (HPO)  
496 (Singleton et al., 2014) terms esophageal atresia and pyloric stenosis as phenotype terms in the  
497 algorithm. Finally, variants passing the pre-filtering criteria in genes from the burden test were  
498 included.

499

500

501 *Variant prioritization using bioinformatic genotype-phenotype correlation tools*

502 Three modules were used: PhenIX (Zemojtel et al., 2014) (<http://compbio.charite.de/PhenIX/>), the  
503 Exomiser (Robinson et al., 2014) (<http://www.sanger.ac.uk/resources/software/exomiser/submit/>)  
504 and the HPO prioritization incorporated within the Cartagenia software. Settings were as followed.

505 Using PhenIX the full patient phenotype in HPO terms was used, the exome target region filter is  
506 on and allele frequency filter of 0.1%, pathogenicity filter was on and mode of inheritance unknown.  
507 Genes were prioritized using PhenIX which compares patient phenotypes against human phenotypes  
508 only. As a cut-of we used a gene relevance score of 0.8 in combination with a variant score of 0.8, or  
509 a total score of 0.9.

510 When using the Exomiser tool we used similar settings: full patient phenotype in HPO terms,  
511 exome target region filter is off, allele frequency filter 0.1%, pathogenicity filter on. We did not  
512 remove dbSNP variants nor used an inheritance model. Genes are now prioritized using hiPhive,  
513 which compares phenotypes against all species. As a cut-of we used a phenotype score of 0.8 in  
514 combination with a variant score of 0.8, or an Exomiser score of 0.9.

515

516 *Pathway enrichment analysis of genes affected by rare variants*

517 To investigate if specific pathways are enriched with ultra-rare variants, Gene IDs with variants in  
518 canonical splice sites (n=16), nonsense variants (n=21), protein altering inframe InDels (n=28) and  
519 missense variants (n=557) were uploaded to Ingenuity pathway Analysis (Qiagen, Venlo, The  
520 Netherlands). Additionally, a more stringent set was uploaded with loss of function variants,  
521 predicted to be loss of function intolerant (PLI  $\geq 0.9$ , n=4) and protein altering variants with a Z-score  
522  $\geq 3$  (n=44).

523

524 *Expression of candidate genes*

525 Candidate gene expression was determined at relevant developmental time points in human and  
526 mouse. Gene expression of top-ranking genes derived from the burden analysis and individual  
527 patient sample prioritizations were determined using datasets (GSE13040, GSE19873, GSE34278,  
528 GSE15872, GSE43381) downloaded from the Gene Expression Omnibus (GEO) (Edgar et al., 2002).  
529 We used public data on mice on the endoderm, mesoderm and ectoderm at E8.25, foregut at E8.5  
530 and esophagus, stomach, pyloric sphincter and intestine at E11.5-E18.5  
531 (<https://www.ncbi.nlm.nih.gov/geo/>) (Stephens et al., 2013, Li et al., 2009, Sherwood et al., 2009,  
532 Millien et al., 2008, Chen et al., 2012). These datasets were imported into BRB-ArrayTools Version:  
533 4.5.0 - Beta\_2. (<http://linus.nci.nih.gov/BRB-ArrayTools.html>), annotated by Bioconductor  
534 ([www.bioconductor.org](http://www.bioconductor.org)), R version 3.2.2 Patched (2015-09-12 r69372) and normalized. We



535 determined differential expression between tissue types and classified upregulated genes being  
536 expressed in the tissue under investigation.

537

538 *Detection of common SNP associated with IHPS*

539 Genome-wide association studies (GWAS) revealed five loci highly associated with IHPS (rs11712066,  
540 rs573872, rs29784, rs1933683 and rs6736913), pointing towards *MBNL1*, *NKX2-5*, *BARX1* and *EML4*  
541 as candidate genes (Feenstra et al., 2012, Everett and Chung, 2013, Fadista et al., 2019). Since  
542 rs6736913 is a low frequency missense variant, we did not further analyze this SNP in our patients.  
543 We used Sanger sequencing to determine the risk allele frequency of the other four SNPs. With a chi  
544 square test we compared the allele frequency in our patients with the gnomAD dataset  
545 (<http://gnomad.broadinstitute.org/>).

546

## 547 **ACKNOWLEDGEMENTS**

548 We are grateful for the help of families, patients and the cooperation of the patient cooperation  
549 “Vereniging voor Ouderen en Kinderen met een Slokdarmafsluiting”. We would like to thank Tom de  
550 Vries Lentsch for preparing the figures.

551

## 552 **COMPETING INTERESTS**

553 Authors do not have any potential conflicts (financial, professional, or personal) relevant to the  
554 manuscript to disclose.

555

## 556 **FUNDING**

557 Erwin Brosens was funded by the Sophia Foundations for Scientific Research, projects SSWO-493 and  
558 SWOO13-09.

559

## 560 **DATA AVAILABILITY**

561 Variants included in Table S4 are submitted to the ClinVar database.  
562 (<http://www.ncbi.nlm.nih.gov/clinvar/>)

563

## 564 **AUTHOR CONTRIBUTIONS STATEMENT**

565 Conceptualization: D.T., R.W., R.H., A.K., E.B.; Methodology: R.B., H.E., W.IJ., A.K., E.B.; Software:  
566 R.B., T.B.; Validation: C.K., V.M., D.H.; Formal analysis: C.K.; Investigation: C.K., Resources: Y.B., N.B.,  
567 A.B., H.E., H.IJ.; Data curation: E.B.; Writing – original draft: C.K., R.H., E.B.; Writing – review &  
568 editing: C.K., R.B., Y.B., A.B., H.E., W.IJ., H.IJ. D.T., R.W., R.H., A.K., E.B.; Visualization: C.K.,  
569 Supervision: E.B.; Project administration: D.T., R.W., R.H., A.K., E.B.; Funding acquisition: D.T., R.W.,  
570 R.H., A.K.

571 **REFERENCES**

- 572 **Adzhubei, I. A., Schmidt, S., Peshkin, L., Ramensky, V. E., Gerasimova, A., Bork, P., Kondrashov, A.**  
573 **S. & Sunyaev, S. R.** (2010). A method and server for predicting damaging missense  
574 mutations. *Nat Methods*, **7**, 248-9.
- 575 **Amarasinghe, K. C., Li, J. & Halgamuge, S. K.** (2013). CoNVEX: copy number variation estimation in  
576 exome sequencing data using HMM. *BMC Bioinformatics*, **14 Suppl 2**, S2.
- 577 **Anderson, R. B., Newgreen, D. F. & Young, H. M.** (2006). Neural crest and the development of the  
578 enteric nervous system. *Adv Exp Med Biol*, **589**, 181-96.
- 579 **Ayme, S., Julian, C., Gambarelli, D., Mariotti, B., Luciani, A., Sudan, N., Maurin, N., Philip, N.,**  
580 **Serville, F., Carles, D., et al.** (1989). Fryns syndrome: report on 8 new cases. *Clin Genet*, **35**,  
581 191-201.
- 582 **Barberia Leache, E., Saavedra Ontiveros, D. & Maroto Edo, M.** (2003). Etiopathogenic analysis of the  
583 caries on three patients with Noonan Syndrome. *Med Oral*, **8**, 136-42.
- 584 **Battaglia, A., Chines, C. & Carey, J. C.** (2006). The FG syndrome: report of a large Italian series. *Am J*  
585 *Med Genet A*, **140**, 2075-9.
- 586 **Bennett, C. A., Petrovski, S., Oliver, K. L. & Berkovic, S. F.** (2017). ExACTly zero or once: A clinically  
587 helpful guide to assessing genetic variants in mild epilepsies. *Neurol Genet*, **3**, e163.
- 588 **Blank, C. E.** (1960). Apert's syndrome (a type of acrocephalosyndactyly)-observations on a British  
589 series of thirty-nine cases. *Ann Hum Genet*, **24**, 151-64.
- 590 **Brosens, E., Burns, A. J., Brooks, A. S., Matera, I., Borrego, S., Ceccherini, I., Tam, P. K., Garcia-**  
591 **Barcelo, M. M., Thapar, N., Benninga, M. A., et al.** (2016a). Genetics of enteric neuropathies.  
592 *Dev Biol*, **417**, 198-208.
- 593 **Brosens, E., Marsch, F., De Jong, E. M., Zaveri, H. P., Hilger, A. C., Choinitzki, V. G., Holscher, A.,**  
594 **Hoffmann, P., Herms, S., Boemers, T. M., et al.** (2016b). Copy number variations in 375  
595 patients with oesophageal atresia and/or tracheoesophageal fistula. *Eur J Hum Genet*, **24**,  
596 1715-1723.
- 597 **Brosens, E., Ploeg, M., Van Bever, Y., Koopmans, A. E., H, I. J., Rottier, R. J., Wijnen, R., Tibboel, D.**  
598 **& De Klein, A.** (2014). Clinical and etiological heterogeneity in patients with tracheo-  
599 esophageal malformations and associated anomalies. *Eur J Med Genet*.
- 600 **Cates, M., Billmire, D. F., Bull, M. J. & Grosfeld, J. L.** (1989). Gastroesophageal dysfunction in  
601 Cornelia de Lange syndrome. *J Pediatr Surg*, **24**, 248-50.
- 602 **Cetin, E., Malas, M. A., Albay, S. & Cankara, N.** (2006). The development of stomach during the fetal  
603 period. *Surg Radiol Anat*, **28**, 438-46.

- 604 **Chen, H., Li, J., Li, H., Hu, Y., Tevebaugh, W., Yamamoto, M., Que, J. & Chen, X.** (2012). Transcript  
605 profiling identifies dynamic gene expression patterns and an important role for Nrf2/Keap1  
606 pathway in the developing mouse esophagus. *PLoS One*, **7**, e36504.
- 607 **Christiano, A. M., Mcgrath, J. A., Tan, K. C. & Uitto, J.** (1996). Glycine substitutions in the triple-  
608 helical region of type VII collagen result in a spectrum of dystrophic epidermolysis bullosa  
609 phenotypes and patterns of inheritance. *Am J Hum Genet*, **58**, 671-81.
- 610 **Christiano, A. M., Suga, Y., Greenspan, D. S., Ogawa, H. & Uitto, J.** (1995). Premature termination  
611 codons on both alleles of the type VII collagen gene (COL7A1) in three brothers with  
612 recessive dystrophic epidermolysis bullosa. *J Clin Invest*, **95**, 1328-34.
- 613 **De Jong, E. M., Felix, J. F., De Klein, A. & Tibboel, D.** (2010). Etiology of esophageal atresia and  
614 tracheoesophageal fistula: "mind the gap". *Curr Gastroenterol Rep*, **12**, 215-22.
- 615 **Deurloo, J. A., Ekkelkamp, S., Schoorl, M., Heij, H. A. & Aronson, D. C.** (2002). Esophageal atresia:  
616 historical evolution of management and results in 371 patients. *Annals of Thoracic Surgery*,  
617 **73**, 267-72.
- 618 **Edgar, R., Domrachev, M. & Lash, A. E.** (2002). Gene Expression Omnibus: NCBI gene expression and  
619 hybridization array data repository. *Nucleic Acids Res*, **30**, 207-10.
- 620 **Elinoff, J. M., Liu, D., Guandalini, S. & Waggoner, D. J.** (2005). Familial pyloric stenosis associated  
621 with developmental delays. *J Pediatr Gastroenterol Nutr*, **41**, 129-32.
- 622 **Everett, K. V. & Chung, E. M.** (2013). Confirmation of two novel loci for infantile hypertrophic pyloric  
623 stenosis on chromosomes 3 and 5. *J Hum Genet*, **58**, 236-7.
- 624 **Fadista, J., Skotte, L., Geller, F., Bybjerg-Grauholm, J., Gortz, S., Romitti, P. A., Caggana, M., Kay, D.  
625 M., Matsson, H., Boyd, H. A., et al.** (2019). Genome-wide meta-analysis identifies BARX1 and  
626 EML4-MTA3 as new loci associated with infantile hypertrophic pyloric stenosis. *Hum Mol  
627 Genet*, **28**, 332-340.
- 628 **Fausett, S. R. & Klingensmith, J.** (2012). Compartmentalization of the foregut tube: developmental  
629 origins of the trachea and esophagus. *Wiley Interdiscip Rev Dev Biol*, **1**, 184-202.
- 630 **Feenstra, B., Geller, F., Carstensen, L., Romitti, P. A., Korberg, I. B., Bedell, B., Krogh, C., Fan, R.,  
631 Svenningsson, A., Caggana, M., et al.** (2013). Plasma lipids, genetic variants near APOA1, and  
632 the risk of infantile hypertrophic pyloric stenosis. *Jama*, **310**, 714-21.
- 633 **Feenstra, B., Geller, F., Krogh, C., Hollegaard, M. V., Gortz, S., Boyd, H. A., Murray, J. C., Hougaard,  
634 D. M. & Melbye, M.** (2012). Common variants near MBNL1 and NKX2-5 are associated with  
635 infantile hypertrophic pyloric stenosis. *Nat Genet*, **44**, 334-7.
- 636 **Felix, J. F., Steegers-Theunissen, R. P., De Walle, H. E., De Klein, A., Torfs, C. P. & Tibboel, D.**  
637 (2007a). Esophageal atresia and tracheoesophageal fistula in children of women exposed to  
638 diethylstilbestrol in utero. *Am J Obstet Gynecol*, **197**, 38.e1-5.

- 639 **Felix, J. F., Tibboel, D. & De Klein, A.** (2007b). Chromosomal anomalies in the aetiology of  
640 oesophageal atresia and tracheo-oesophageal fistula. *Eur J Med Genet*, **50**, 163-75.
- 641 **Felix, J. F., Van Dooren, M. F., Klaassens, M., Hop, W. C., Torfs, C. P. & Tibboel, D.** (2008).  
642 Environmental factors in the etiology of esophageal atresia and congenital diaphragmatic  
643 hernia: results of a case-control study. *Birth Defects Res A Clin Mol Teratol*, **82**, 98-105.
- 644 **Feng, Y., Chen, R., Li, X. & Mo, X.** (2016). Environmental factors in the etiology of isolated and  
645 nonisolated esophageal atresia in a Chinese population: A case-control study. *Birth Defects*  
646 *Res A Clin Mol Teratol*, **106**, 840-846.
- 647 **Franceschini, P., Guala, A., Licata, D., Franceschini, D., Signorile, F. & Di Cara, G.** (1997). Esophageal  
648 atresia with distal tracheoesophageal fistula in a patient with fronto-metaphyseal dysplasia.  
649 *Am J Med Genet*, **73**, 10-4.
- 650 **Freeman, S. B., Torfs, C. P., Romitti, P. A., Royle, M. H., Druschel, C., Hobbs, C. A. & Sherman, S. L.**  
651 (2009). Congenital gastrointestinal defects in Down syndrome: a report from the Atlanta and  
652 National Down Syndrome Projects. *Clin Genet*, **75**, 180-4.
- 653 **Gargiulo, A., Auricchio, R., Barone, M. V., Cotugno, G., Reardon, W., Milla, P. J., Ballabio, A.,**  
654 **Ciccodicola, A. & Auricchio, A.** (2007). Filamin A is mutated in X-linked chronic idiopathic  
655 intestinal pseudo-obstruction with central nervous system involvement. *Am J Hum Genet*, **80**,  
656 751-8.
- 657 **Genome of the Netherlands, C.** (2014). Whole-genome sequence variation, population structure and  
658 demographic history of the Dutch population. *Nat Genet*, **46**, 818-25.
- 659 **Gillis, L. A., Mccallum, J., Kaur, M., Descipio, C., Yaeger, D., Mariani, A., Kline, A. D., Li, H. H.,**  
660 **Devoto, M., Jackson, L. G., et al.** (2004). NIPBL mutational analysis in 120 individuals with  
661 Cornelia de Lange syndrome and evaluation of genotype-phenotype correlations. *Am J Hum*  
662 *Genet*, **75**, 610-23.
- 663 **Gischler, S. J., Mazer, P., Duivenvoorden, H. J., Van Dijk, M., Bax, N. M., Hazebroek, F. W. &**  
664 **Tibboel, D.** (2009). Interdisciplinary structural follow-up of surgical newborns: a prospective  
665 evaluation. *J Pediatr Surg*, **44**, 1382-9.
- 666 **Gripp, K. W. & Lin, A. E.** (1993). Costello Syndrome. In: PAGON, R. A., ADAM, M. P., ARDINGER, H. H.,  
667 BIRD, T. D., DOLAN, C. R., FONG, C. T., SMITH, R. J. H. & STEPHENS, K. (eds.) *GeneReviews(R)*.  
668 Seattle (WA): University of Washington, Seattle  
669 University of Washington, Seattle. All rights reserved.
- 670 **Gross, R. E.** (1947). Atresia of the esophagus. *Am J Dis Child*, **74**, 369.
- 671 **Halim, D., Brosens, E., Muller, F., Wangler, M. F., Beaudet, A. L., Lupski, J. R., Akdemir, Z. H. C.,**  
672 **Doukas, M., Stoop, H. J., De Graaf, B. M., et al.** (2017). Loss-of-Function Variants in MYLK

- 673 Cause Recessive Megacystis Microcolon Intestinal Hypoperistalsis Syndrome. *Am J Hum*  
674 *Genet*, **101**, 123-129.
- 675 **Hayes, M. A. & Goldenberg, I. S.** (1957). The problems of infantile pyloric stenosis. *Surg Gynecol*  
676 *Obstet*, **104**, 105-38.
- 677 **Heath, J. K.** (2010). Chapter Four - Transcriptional Networks and Signaling Pathways that Govern  
678 Vertebrate Intestinal Development. In: PETER, K. (ed.) *Current Topics in Developmental*  
679 *Biology*. Academic Press.
- 680 **Hilger, A. C., Halbritter, J., Pennimpede, T., Van Der Ven, A., Sarma, G., Braun, D. A., Porath, J. D.,**  
681 **Kohl, S., Hwang, D. Y., Dworschak, G. C., et al.** (2015). Targeted Resequencing of 29  
682 Candidate Genes and Mouse Expression Studies Implicate ZIC3 and FOXF1 in Human  
683 VATER/VACTERL Association. *Hum Mutat*, **36**, 1150-4.
- 684 **Hovnanian, A., Hilal, L., Blanchet-Bardon, C., De Prost, Y., Christiano, A. M., Uitto, J. & Goossens,**  
685 **M.** (1994). Recurrent nonsense mutations within the type VII collagen gene in patients with  
686 severe recessive dystrophic epidermolysis bullosa. *Am J Hum Genet*, **55**, 289-96.
- 687 **Hu, H., Huff, C. D., Moore, B., Flygare, S., Reese, M. G. & Yandell, M.** (2013). VAAST 2.0: improved  
688 variant classification and disease-gene identification using a conservation-controlled amino  
689 acid substitution matrix. *Genet Epidemiol*, **37**, 622-34.
- 690 **Ilhan, O., Bor, M., Gunendi, T. & Dörterler, M. E.** (2018). Hypertrophic pyloric stenosis following  
691 repair of oesophageal atresia and tracheo-oesophageal fistula in a neonate. *BMJ Case Rep*,  
692 **2018**.
- 693 **Jacobs, I. J. & Que, J.** (2013). Genetic and cellular mechanisms of the formation of esophageal atresia  
694 and tracheoesophageal fistula. *Dis Esophagus*, **26**, 356-8.
- 695 **Jayewickreme, C. D. & Shivdasani, R. A.** (2015). Control of stomach smooth muscle development and  
696 intestinal rotation by transcription factor BARX1. *Dev Biol*, **405**, 21-32.
- 697 **Jongmans, M. C., Van Ravenswaaij-Arts, C. M., Pitteloud, N., Ogata, T., Sato, N., Claahsen-Van Der**  
698 **Grinten, H. L., Van Der Donk, K., Seminara, S., Bergman, J. E., Brunner, H. G., et al.** (2009).  
699 CHD7 mutations in patients initially diagnosed with Kallmann syndrome--the clinical overlap  
700 with CHARGE syndrome. *Clin Genet*, **75**, 65-71.
- 701 **Kennedy, B., Kronenberg, Z., Hu, H., Moore, B., Flygare, S., Reese, M. G., Jorde, L. B., Yandell, M. &**  
702 **Huff, C.** (2014). Using VAAST to Identify Disease-Associated Variants in Next-Generation  
703 Sequencing Data. *Curr Protoc Hum Genet*, **81**, 6 14 1-25.
- 704 **Kim, H. G., Kurth, I., Lan, F., Meliciani, I., Wenzel, W., Eom, S. H., Kang, G. B., Rosenberger, G.,**  
705 **Tekin, M., Ozata, M., et al.** (2008). Mutations in CHD7, encoding a chromatin-remodeling  
706 protein, cause idiopathic hypogonadotropic hypogonadism and Kallmann syndrome. *Am J*  
707 *Hum Genet*, **83**, 511-9.

- 708 **Kircher, M., Witten, D. M., Jain, P., O'roak, B. J., Cooper, G. M. & Shendure, J.** (2014). A general  
709 framework for estimating the relative pathogenicity of human genetic variants. *Nat Genet*,  
710 **46**, 310-5.
- 711 **Koyuncu, E., Malas, M. A., Albay, S., Cankara, N. & Karahan, N.** (2009). The development of fetal  
712 pylorus during the fetal period. *Surg Radiol Anat*, **31**, 335-41.
- 713 **Kroes, H. Y., Pals, G. & Van Essen, A. J.** (2003). Ehlers-Danlos syndrome type IV: unusual congenital  
714 anomalies in a mother and son with a COL3A1 mutation and a normal collagen III protein  
715 profile. *Clin Genet*, **63**, 224-7.
- 716 **Krogh, C., Fischer, T. K., Skotte, L., Biggar, R. J., Oyen, N., Skytthe, A., Goertz, S., Christensen, K.,  
717 Wohlfahrt, J. & Melbye, M.** (2010). Familial aggregation and heritability of pyloric stenosis.  
718 *JAMA*, **303**, 2393-9.
- 719 **Krogh, C., Gortz, S., Wohlfahrt, J., Biggar, R. J., Melbye, M. & Fischer, T. K.** (2012). Pre- and perinatal  
720 risk factors for pyloric stenosis and their influence on the male predominance. *Am J*  
721 *Epidemiol*, **176**, 24-31.
- 722 **Kuivaniemi, H., Kontusaari, S., Tromp, G., Zhao, M. J., Sabol, C. & Prockop, D. J.** (1990). Identical  
723 G+1 to A mutations in three different introns of the type III procollagen gene (COL3A1)  
724 produce different patterns of RNA splicing in three variants of Ehlers-Danlos syndrome. IV.  
725 An explanation for exon skipping some mutations and not others. *J Biol Chem*, **265**, 12067-  
726 74.
- 727 **Landrum, M. J., Lee, J. M., Riley, G. R., Jang, W., Rubinstein, W. S., Church, D. M. & Maglott, D. R.**  
728 (2014). ClinVar: public archive of relationships among sequence variation and human  
729 phenotype. *Nucleic Acids Res*, **42**, D980-5.
- 730 **Lek, M., Karczewski, K. J., Minikel, E. V., Samocha, K. E., Banks, E., Fennell, T., O'donnell-Luria, A.  
731 H., Ware, J. S., Hill, A. J., Cummings, B. B., et al.** (2016). Analysis of protein-coding genetic  
732 variation in 60,706 humans. *Nature*, **536**, 285-91.
- 733 **Li, X., Udager, A. M., Hu, C., Qiao, X. T., Richards, N. & Gumucio, D. L.** (2009). Dynamic patterning at  
734 the pylorus: formation of an epithelial intestine-stomach boundary in late fetal life. *Dev Dyn*,  
735 **238**, 3205-17.
- 736 **Lodha, A. K., Satodia, P. & Whyte, H.** (2005). Fetal alcohol syndrome and pyloric stenosis: alcohol  
737 induced or an association? *J Perinat Med*, **33**, 262-3.
- 738 **Macchini, F., Parente, G., Morandi, A., Farris, G., Gentilino, V. & Leva, E.** (2017). Classification of  
739 Esophageal Strictures following Esophageal Atresia Repair. *Eur J Pediatr Surg*.
- 740 **Macmahon, B.** (2006). The continuing enigma of pyloric stenosis of infancy: a review. *Epidemiology*,  
741 **17**, 195-201.

- 742 **Mangyanda, M. K., Mbuila, C., Geniez, L., Personne, A., Boize, P., Gasmi, E. H., Saf, E. & Hayat, P.**  
743 (1998). [Fetal alcohol syndrome and hypertrophic pyloric stenosis in two brothers]. *Arch*  
744 *Pediatr*, **5**, 695-6.
- 745 **Markel, T. A., Proctor, C., Ying, J. & Winchester, P. D.** (2015). Environmental pesticides increase the  
746 risk of developing hypertrophic pyloric stenosis. *J Pediatr Surg*, **50**, 1283-8.
- 747 **Martinez-Frias, M. L.** (1994). Developmental field defects and associations: epidemiological evidence  
748 of their relationship. *Am J Med Genet*, **49**, 45-51.
- 749 **Martinez-Frias, M. L. & Frias, J. L.** (1997). Primary developmental field. III: Clinical and  
750 epidemiological study of blastogenetic anomalies and their relationship to different MCA  
751 patterns. *Am J Med Genet*, **70**, 11-5.
- 752 **Mcmullen, K. P., Karnes, P. S., Moir, C. R. & Michels, V. V.** (1996). Familial recurrence of  
753 tracheoesophageal fistula and associated malformations. *Am J Med Genet*, **63**, 525-8.
- 754 **Millien, G., Beane, J., Lenburg, M., Tsao, P. N., Lu, J., Spira, A. & Ramirez, M. I.** (2008).  
755 Characterization of the mid-foregut transcriptome identifies genes regulated during lung bud  
756 induction. *Gene Expr Patterns*, **8**, 124-39.
- 757 **Mori, M., Yamagata, T., Mori, Y., Nokubi, M., Saito, K., Fukushima, Y. & Momoi, M. Y.** (1996). Elastic  
758 fiber degeneration in Costello syndrome. *Am J Med Genet*, **61**, 304-9.
- 759 **Nezelof, C., Jaubert, F. & Lyon, G.** (1976). [Familial syndrome combining short small intestine,  
760 intestinal malrotation, pyloric hypertrophy and brain malformation. 3 anatomoclinical case  
761 reports]. *Ann Anat Pathol (Paris)*, **21**, 401-12.
- 762 **Ng, P. C. & Henikoff, S.** (2001). Predicting deleterious amino acid substitutions. *Genome Res*, **11**, 863-  
763 74.
- 764 **Oddsberg, J., Lu, Y. & Lagergren, J.** (2012). Aspects of esophageal atresia in a population-based  
765 setting: incidence, mortality, and cancer risk. *Pediatr Surg Int*, **28**, 249-57.
- 766 **Palacios M.E.C., Sanz, J. C., Tàrranga A.B.D., San Roman C.G. & J.J.V., C.** (2014). Esophageal atresia  
767 and hypertrophic pyloric stenosis: An association to consider. *Case Rep Intern Med*, **1**, 187-90.
- 768 **Panteli, C.** (2009). New insights into the pathogenesis of infantile pyloric stenosis. *Pediatr Surg Int*,  
769 **25**, 1043-52.
- 770 **Pedersen, R. N., Calzolari, E., Husby, S., Garne, E. & Group, E. W.** (2012). Oesophageal atresia:  
771 prevalence, prenatal diagnosis and associated anomalies in 23 European regions. *Arch Dis*  
772 *Child*, **97**, 227-32.
- 773 **Peeters, B., Benninga, M. A. & Hennekam, R. C.** (2012). Infantile hypertrophic pyloric stenosis--  
774 genetics and syndromes. *Nat Rev Gastroenterol Hepatol*, **9**, 646-60.
- 775 **Pelz, L., Unger, K. & Radke, M.** (1994). Esophageal stenosis in acrocephalosyndactyly type I. *Am J*  
776 *Med Genet*, **53**, 91.



- 777 **Perin, S., Mccann, C. J., Borrelli, O., De Coppi, P. & Thapar, N.** (2017). Update on Foregut Molecular  
778 Embryology and Role of Regenerative Medicine Therapies. *Front Pediatr*, **5**, 91.
- 779 **Que, J., Okubo, T., Goldenring, J. R., Nam, K. T., Kurotani, R., Morrissey, E. E., Taranova, O., Pevny, L.**  
780 **H. & Hogan, B. L.** (2007). Multiple dose-dependent roles for Sox2 in the patterning and  
781 differentiation of anterior foregut endoderm. *Development*, **134**, 2521-31.
- 782 **Rajab, A., Heathcote, K., Joshi, S., Jeffery, S. & Patton, M.** (2002). Heterogeneity for congenital  
783 generalized lipodystrophy in seventeen patients from Oman. *Am J Med Genet*, **110**, 219-25.
- 784 **Rajab, A., Straub, V., Mccann, L. J., Seelow, D., Varon, R., Barresi, R., Schulze, A., Lucke, B.,**  
785 **Lutzkendorf, S., Karbasiyan, M., et al.** (2010). Fatal cardiac arrhythmia and long-QT  
786 syndrome in a new form of congenital generalized lipodystrophy with muscle rippling (CGL4)  
787 due to PTRF-CAVIN mutations. *PLoS Genet*, **6**, e1000874.
- 788 **Robert, E., Mutchinick, O., Mastroiacovo, P., Knudsen, L. B., Daltveit, A. K., Castilla, E. E., Lancaster,**  
789 **P., Kallen, B. & Cocchi, G.** (1993). An international collaborative study of the epidemiology of  
790 esophageal atresia or stenosis. *Reprod Toxicol*, **7**, 405-21.
- 791 **Robinson, P. N., Kohler, S., Oellrich, A., Sanger Mouse Genetics, P., Wang, K., Mungall, C. J., Lewis,**  
792 **S. E., Washington, N., Bauer, S., Seelow, D., et al.** (2014). Improved exome prioritization of  
793 disease genes through cross-species phenotype comparison. *Genome Res*, **24**, 340-8.
- 794 **Rollins, M. D., Shields, M. D., Quinn, R. J. & Wooldridge, M. A.** (1989). Pyloric stenosis: congenital or  
795 acquired? *Archives of Disease in Childhood*, **64**, 138-139.
- 796 **Ruderfer, D. M., Hamamsy, T., Lek, M., Karczewski, K. J., Kavanagh, D., Samocha, K. E., Daly, M. J.,**  
797 **Macarthur, D. G., Fromer, M. & Purcell, S. M.** (2016). Patterns of genic intolerance of rare  
798 copy number variation in 59,898 human exomes. *Nat Genet*, **48**, 1107-11.
- 799 **Ruzzi, L., Gagnoux-Palacios, L., Pinola, M., Belli, S., Meneguzzi, G., D'alessio, M. & Zambruno, G.**  
800 (1997). A homozygous mutation in the integrin alpha6 gene in junctional epidermolysis  
801 bullosa with pyloric atresia. *J Clin Invest*, **99**, 2826-31.
- 802 **Schuffler, M. D., Bird, T. D., Sumi, S. M. & Cook, A.** (1978). A familial neuronal disease presenting as  
803 intestinal pseudoobstruction. *Gastroenterology*, **75**, 889-98.
- 804 **Schulz, A. C., Bartels, E., Stressig, R., Ritgen, J., Schmiedeke, E., Mattheisen, M., Draaken, M.,**  
805 **Ludwig, M., Bagci, S., Muller, A., et al.** (2012). Nine new twin pairs with esophageal atresia: a  
806 review of the literature and performance of a twin study of the disorder. *Birth Defects Res A*  
807 *Clin Mol Teratol*, **94**, 182-6.
- 808 **Schwarz, J. M., Rodelsperger, C., Schuelke, M. & Seelow, D.** (2010). MutationTaster evaluates  
809 disease-causing potential of sequence alterations. *Nat Methods*, **7**, 575-6.
- 810 **Self, M., Geng, X. & Oliver, G.** (2009). Six2 activity is required for the formation of the mammalian  
811 pyloric sphincter. *Dev Biol*, **334**, 409-17.

- 812 **Shah, N., Rodriguez, M., Louis, D. S., Lindley, K. & Milla, P. J.** (1999). Feeding difficulties and foregut  
813 dysmotility in Noonan's syndrome. *Arch Dis Child*, **81**, 28-31.
- 814 **Sherwood, R. I., Chen, T. Y. & Melton, D. A.** (2009). Transcriptional dynamics of endodermal organ  
815 formation. *Dev Dyn*, **238**, 29-42.
- 816 **Siepel, A., Bejerano, G., Pedersen, J. S., Hinrichs, A. S., Hou, M., Rosenbloom, K., Clawson, H.,  
817 Spieth, J., Hillier, L. W., Richards, S., et al.** (2005). Evolutionarily conserved elements in  
818 vertebrate, insect, worm, and yeast genomes. *Genome Res*, **15**, 1034-50.
- 819 **Singleton, M. V., Guthery, S. L., Voelkerding, K. V., Chen, K., Kennedy, B., Margraf, R. L., Durtschi, J.,  
820 Eilbeck, K., Reese, M. G., Jorde, L. B., et al.** (2014). Phevor combines multiple biomedical  
821 ontologies for accurate identification of disease-causing alleles in single individuals and small  
822 nuclear families. *Am J Hum Genet*, **94**, 599-610.
- 823 **Smith, D. M., Grasty, R. C., Theodosiou, N. A., Tabin, C. J. & Nascone-Yoder, N. M.** (2000a).  
824 Evolutionary relationships between the amphibian, avian, and mammalian stomachs. *Evol  
825 Dev*, **2**, 348-59.
- 826 **Smith, R. L., Edwards, M. J., Notaras, E. & O'loughlin, E. V.** (2000b). Esophageal dysmotility in  
827 brothers with an FG-like syndrome. *Am J Med Genet*, **91**, 185-9.
- 828 **Solomon, B. D.** (2011). VACTERL/VATER Association. *Orphanet J Rare Dis*, **6**, 56.
- 829 **Solomon, B. D., Bear, K. A., Kimonis, V., De Klein, A., Scott, D. A., Shaw-Smith, C., Tibboel, D.,  
830 Reutter, H. & Giampietro, P. F.** (2012). Clinical geneticists' views of VACTERL/VATER  
831 association. *Am J Med Genet A*, **158a**, 3087-100.
- 832 **Sorensen, H. T., Norgard, B., Pedersen, L., Larsen, H. & Johnsen, S. P.** (2002). Maternal smoking and  
833 risk of hypertrophic infantile pyloric stenosis: 10 year population based cohort study. *BMJ*,  
834 **325**, 1011-2.
- 835 **Stephens, D. N., Klein, R. H., Salmans, M. L., Gordon, W., Ho, H. & Andersen, B.** (2013). The Ets  
836 transcription factor EHF as a regulator of cornea epithelial cell identity. *J Biol Chem*, **288**,  
837 34304-24.
- 838 **Stringer, E. J., Pritchard, C. A. & Beck, F.** (2008). Cdx2 initiates histodifferentiation of the midgut  
839 endoderm. *FEBS Lett*, **582**, 2555-60.
- 840 **Svenningsson, A., Soderhall, C., Persson, S., Lundberg, F., Luthman, H., Chung, E., Gardiner, M.,  
841 Kockum, I. & Nordenskjold, A.** (2012). Genome-wide linkage analysis in families with  
842 infantile hypertrophic pyloric stenosis indicates novel susceptibility loci. *J Hum Genet*, **57**,  
843 115-21.
- 844 **Tanner, M. S., Smith, B. & Lloyd, J. K.** (1976). Functional intestinal obstruction due to deficiency of  
845 argyrophil neurones in the myenteric plexus. Familial syndrome presenting with short small  
846 bowel, malrotation, and pyloric hypertrophy. *Arch Dis Child*, **51**, 837-41.

- 847 **Taylor, A. I.** (1968). Autosomal trisomy syndromes: a detailed study of 27 cases of Edwards'  
848 syndrome and 27 cases of Patau's syndrome. *J Med Genet*, **5**, 227-52.
- 849 **Tugay, M., Yildiz, F., Utkan, T., Sarioglu, Y. & Gacar, N.** (2003). Gastric smooth muscle contractility  
850 changes in the esophageal atresia rat model: an in vitro study. *J Pediatr Surg*, **38**, 1366-70.
- 851 **Tugay, M., Yildiz, F., Utkan, T., Ulak, G., Gacar, N. & Erden, F.** (2001). Impaired esophageal reactivity  
852 in adriamycin-induced rat esophageal atresia: an in vitro study. *J Pediatr Surg*, **36**, 1569-73.
- 853 **Unger, S., Mainberger, A., Spitz, C., Bahr, A., Zeschnigk, C., Zabel, B., Superti-Furga, A. & Morris-  
854 Rosendahl, D. J.** (2007). Filamin A mutation is one cause of FG syndrome. *Am J Med Genet A*,  
855 **143a**, 1876-9.
- 856 **Van Beelen, N. W., Mous, D. S., Brosens, E., De Klein, A., Van De Ven, C. P., Vlot, J., Ijsselstijn, H. &  
857 Wijnen, R.** (2014). Increased incidence of hypertrophic pyloric stenosis in esophageal atresia  
858 patients. *Eur J Pediatr Surg*, **24**, 20-4.
- 859 **Van Staey, M., De Bie, S., Matton, M. T. & De Roose, J.** (1984). Familial congenital esophageal  
860 atresia. Personal case report and review of the literature. *Hum Genet*, **66**, 260-6.
- 861 **Vanderwinden, J. M., Mailleux, P., Schiffmann, S. N., Vanderhaeghen, J. J. & De Laet, M. H.** (1992).  
862 Nitric oxide synthase activity in infantile hypertrophic pyloric stenosis. *N Engl J Med*, **327**,  
863 511-5.
- 864 **Varki, R., Sadowski, S., Pfendner, E. & Uitto, J.** (2006). Epidermolysis bullosa. I. Molecular genetics of  
865 the junctional and hemidesmosomal variants. *J Med Genet*, **43**, 641-52.
- 866 **Veenma, D., Brosens, E., De Jong, E., Van De Ven, C., Meeussen, C., Cohen-Overbeek, T., Boter, M.,  
867 Eussen, H., Douben, H., Tibboel, D., et al.** (2012). Copy number detection in discordant  
868 monozygotic twins of Congenital Diaphragmatic Hernia (CDH) and Esophageal Atresia (EA)  
869 cohorts. *Eur J Hum Genet*, **20**, 298-304.
- 870 **Verzi, M. P., Stanfel, M. N., Moses, K. A., Kim, B. M., Zhang, Y., Schwartz, R. J., Shivdasani, R. A. &  
871 Zimmer, W. E.** (2009). Role of the homeodomain transcription factor Bapx1 in mouse distal  
872 stomach development. *Gastroenterology*, **136**, 1701-10.
- 873 **Vivona, G., Frontali, M., Di Nunzio, M. L. & Vendemiati, A.** (1987). Aplasia cutis congenita and/or  
874 epidermolysis bullosa. *Am J Med Genet*, **26**, 497-502.
- 875 **Warren, J., Evans, K. & Carter, C. O.** (1979). Offspring of patients with tracheo-oesophageal fistula. *J  
876 Med Genet*, **16**, 338-40.
- 877 **Woo, J., Miletich, I., Kim, B. M., Sharpe, P. T. & Shivdasani, R. A.** (2011). Barx1-mediated inhibition  
878 of Wnt signaling in the mouse thoracic foregut controls tracheo-esophageal septation and  
879 epithelial differentiation. *PLoS One*, **6**, e22493.
- 880 **Yandell, M., Huff, C., Hu, H., Singleton, M., Moore, B., Xing, J., Jorde, L. B. & Reese, M. G.** (2011). A  
881 probabilistic disease-gene finder for personal genomes. *Genome Res*, **21**, 1529-42.

882 **Zemojtel, T., Kohler, S., Mackenroth, L., Jager, M., Hecht, J., Krawitz, P., Graul-Neumann, L.,**  
883 **Doelken, S., Ehmke, N., Spielmann, M., et al. (2014).** Effective diagnosis of genetic disease  
884 by computational phenotype analysis of the disease-associated genome. *Sci Transl Med*, **6**,  
885 252ra123.

886 **Zhang, R., Marsch, F., Kause, F., Degenhardt, F., Schmiedeke, E., Marzheuser, S., Hoppe, B.,**  
887 **Bachour, H., Boemers, T. M., Schafer, M., et al. (2017).** Array-based molecular karyotyping in  
888 115 VATER/VACTERL and VATER/VACTERL-like patients identifies disease-causing copy  
889 number variations. *Birth Defects Res*, **109**, 1063-1069.

890 **Zwink, N., Choinitzki, V., Baudisch, F., Holscher, A., Boemers, T. M., Tural, S., Kurz, R., Heydweiller,**  
891 **A., Keppler, K., Muller, A., et al. (2016).** Comparison of environmental risk factors for  
892 esophageal atresia, anorectal malformations, and the combined phenotype in 263 German  
893 families. *Dis Esophagus*, **29**, 1032-1042.

894

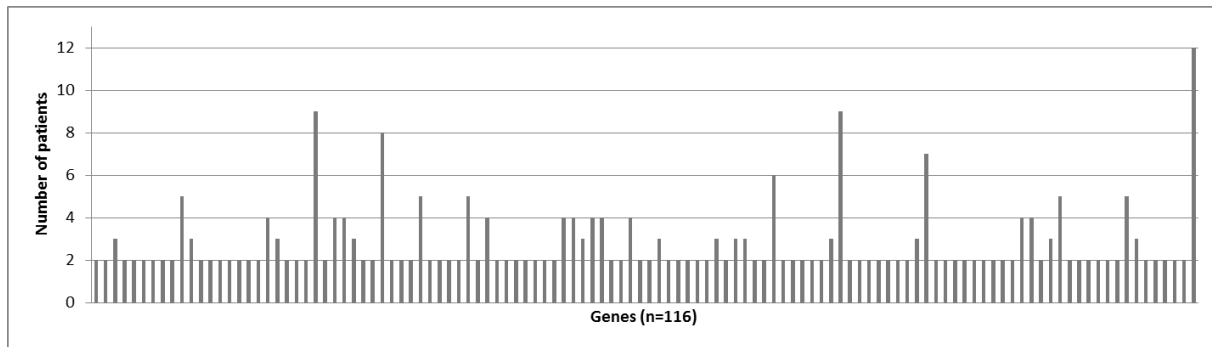

895  
896

897 **Figure 1. Number of patients with variants per gene**

898 36 genes were found in  $\geq 3$  patients of which six genes were present in more than five patients (*CNTN2*, *DSPP*,  
899 *NOTCH4*, *PRRC2A*, *SEC16B*, *ZNF717*). See also Table S6.

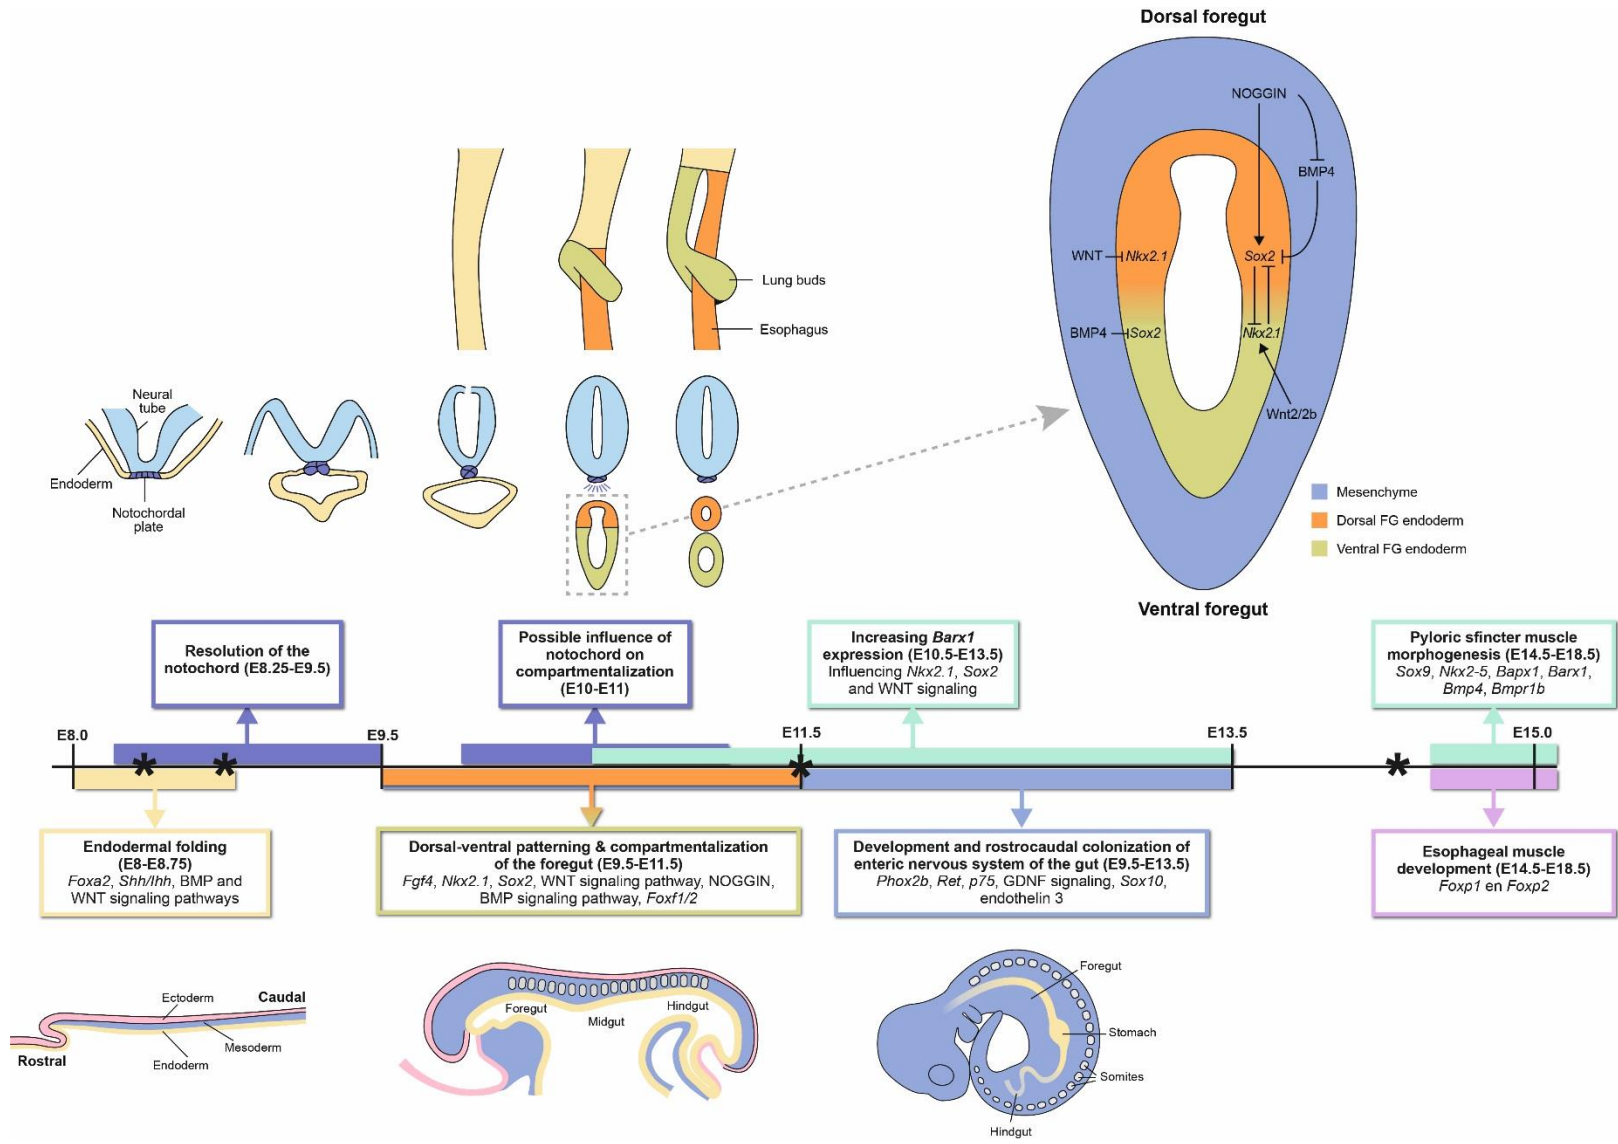

900  
 901  
 902

**Figure 2. Timeline of models and genes known to be important for foregut development in mice**

(Heath, 2010, Fausett and Klingensmith, 2012, Perin et al., 2017, Anderson et al., 2006), \* = time points used in expression analysis (see Table S5)

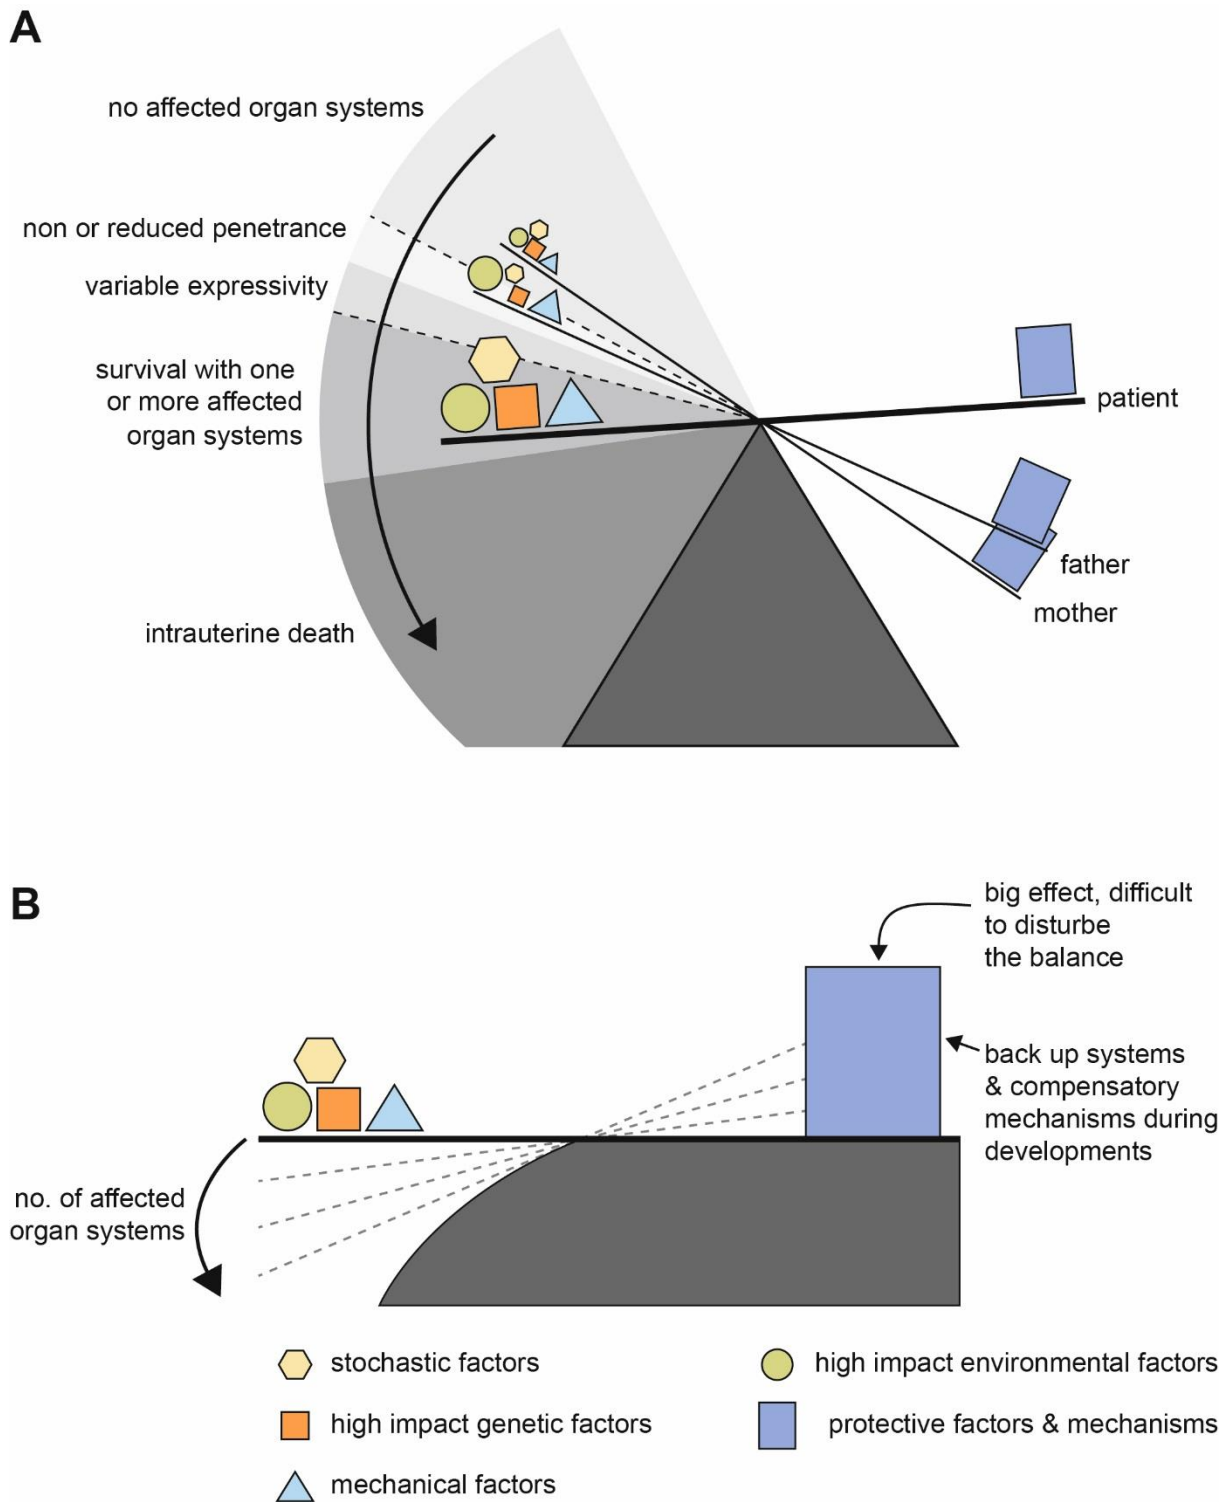

903

904 **Figure 3. Two models for EA/IHPS etiology**

905 A = burden model, B = slippery slope model. The combination of multiple high impact factors (genetic,  
 906 environmental, mechanical and/or stochastic) together can modulate the phenotypical spectrum. These risk factors  
 907 are in balance with protective factors like backup systems and compensatory mechanisms.

**Table 1. Genetic syndromes and mutated genes with tracheoesophageal and pyloric anomalies as variable features**

| Syndrome                                                                               | Esophageal or pyloric anomaly                | Inheritance | Loci               | Gene(s)                      | OMIM             | Ref                                                                        |
|----------------------------------------------------------------------------------------|----------------------------------------------|-------------|--------------------|------------------------------|------------------|----------------------------------------------------------------------------|
| <b>Esophageal atresia or stenosis</b>                                                  |                                              |             |                    |                              |                  |                                                                            |
| <b>Epidermolysis bullosa, junctional, with pyloric stenosis or atresia<sup>c</sup></b> | Esophageal and pyloric atresia or stenosis   | AR          | 2q31.1<br>17q25.1  | <i>ITGA4</i><br><i>ITGA6</i> | 226730<br>226730 | (Varki et al., 2006, Vivona et al., 1987)<br>(Ruzzi et al., 1997)          |
| <b>Ehlers-Danlos syndrome<sup>c</sup></b>                                              | EA and IHPS                                  | AD          | 2q32.2             | <i>COL3A1</i>                | 130050           | (Kroes et al., 2003, Kuivaniemi et al., 1990)                              |
| <b>Trisomy 13</b>                                                                      | EA/TEF and IHPS                              | AD          | 13                 | multiple                     | NA               | (Brosens et al., 2014, Taylor, 1968)                                       |
| <b>Trisomy 18</b>                                                                      | EA/TEF and IHPS                              | AD          | 18                 | multiple                     | NA               | (Brosens et al., 2014, Taylor, 1968)                                       |
| <b>Trisomy 21</b>                                                                      | EA/TEF and IHPS                              | AD          | 21                 | multiple                     | 190685           | (Brosens et al., 2014, Freeman et al., 2009)                               |
| <b>Fryns syndrome</b>                                                                  | EA/TEF and IHPS                              | U           | unknown            | unknown                      | 229850           | (Ayme et al., 1989)                                                        |
| <b>Fetal alcohol syndrome</b>                                                          | EA/TEF and IHPS                              | NA          | NA                 | NA                           | NA               | (Brosens et al., 2014, Lodha et al., 2005, Mangyanda et al., 1998)         |
| <b>Motility anomalies of the esophagus</b>                                             |                                              |             |                    |                              |                  |                                                                            |
| <b>Epidermolysis bullosa dystrophica<sup>c</sup></b>                                   | Esophageal strictures and stenosis           | AR, AD      | 3p21.31<br>11q22.2 | <i>COL7A1</i><br><i>MMP1</i> | 131750<br>226600 | (Christiano et al., 1995, Hovnanian et al., 1994, Christiano et al., 1996) |
| <b>Cornelia de Lange syndrome<sup>B,C</sup></b>                                        | Esophageal stenosis and dysmotility and IHPS | AD          | 5p13.2             | <i>NIPBL</i>                 | 122470           | (Cates et al., 1989, Gillis et al., 2004)                                  |
| <b>Apert syndrome</b>                                                                  | Esophageal stenosis and IHPS                 | AD          | 10q26.13           | <i>FGFR2</i>                 | 101200           | (Pelz et al., 1994, Blank, 1960)                                           |
| <b>Congenital generalized lipodystrophy</b>                                            | Esophageal dysmotility and IHPS              | AR          | 17q21.2            | <i>PTRF</i>                  | 613327           | (Rajab et al., 2010, Rajab et al., 2002)                                   |
| <b>Opitz-Kaveggia syndrome</b>                                                         | Nutcracker esophagus and IHPS                | XL          | Xq13               | <i>MED12</i>                 | 305450           | (Smith et al., 2000b, Battaglia et al., 2006)                              |
| <b>Noonan syndrome<sup>c</sup></b>                                                     | Esophageal dysmotility and IHPS              | AD          | 12q24.13           | <i>PTPN11</i>                | 163950           | (Shah et al., 1999, Barberia Leache et al., 2003)                          |
| <b>Visceral neuropathy</b>                                                             | Dilated non-peristaltic esophagus and IHPS   | U           | unknown            | unknown                      | 243180           | (Schuffler et al., 1978, Tanner et al., 1976)                              |
| <b>Costello syndrome</b>                                                               | Loss of elastic fibers in esophagus, IHPS    | AD          | 11p15.5            | <i>HRAS</i>                  | 218040           | (Mori et al., 1996, Gripp and Lin, 1993)                                   |
| <b>Other associations</b>                                                              |                                              |             |                    |                              |                  |                                                                            |
| <b>Chronic idiopathic intestinal pseudo obstruction<sup>B,C</sup></b>                  | Gastro-intestinal dysmotility and IHPS       | XL          | Xq28               | <i>FLNA</i>                  | 300048           | (Tanner et al., 1976, Gargiulo et al., 2007)                               |
| <b>Fronto-metaphyseal dysplasia<sup>B</sup></b>                                        | EA/TEF                                       | XL          | Xq28               | <i>FLNA</i>                  | 305620           | (Franceschini et al., 1997)                                                |
| <b>X-linked periventricular heterotopia<sup>B</sup></b>                                | IHPS                                         | XL          | Xq28               | <i>FLNA</i>                  | 300049           | (Nezelof et al., 1976)                                                     |
| <b>FG syndrome<sup>B,C</sup></b>                                                       | Esophageal dysmotility and IHPS              | XL          | Xq28               | <i>FLNA</i>                  | 300321           | (Unger et al., 2007, Peeters et al., 2012)                                 |
| <b>CHARGE syndrome<sup>B,C</sup></b>                                                   | EA/TEF                                       | AD          | 8q12.1-<br>q12.2   | <i>CHD7</i>                  | 214800           | (Brosens et al., 2014)                                                     |
| <b>Hypogonadotropic hypogonadism with or without anosmia<sup>B,C</sup></b>             | IHPS <sup>A</sup>                            | AD          | 8q12.1-<br>q12.2   | <i>CHD7</i>                  | 612370           | (Jongmans et al., 2009, Kim et al., 2008)                                  |



910 This table is modified from two reviews on esophageal atresia (Brosens et al., 2014) and infantile hypertrophic pyloric stenosis (Peeters et al., 2012). AD; autosomal dominant, AR;  
911 autosomal recessive, U; unknown, NA; not applicable, XL; X-linked; EA; esophageal atresia, TEF; trachea-esophageal fistula, IHPS; infantile hypertrophic pyloric stenosis. <sup>A</sup> In literature  
912 IHPS is associated with other genes responsible for this syndrome. <sup>B</sup> No overlap in EA and IHPS phenotype for this syndrome, the gene mutated in this syndrome can be responsible  
913 for different syndromes in which either EA or IHPS are variable features. <sup>C</sup> More genes associated to possible several subtypes of this syndrome.

914  
915

**Table 2. Phenotype description**

| Individual | Gender | EA-type | Phenotype                                                                                                                                                                                                                                                                                                                                                          | Remarks                                                      |
|------------|--------|---------|--------------------------------------------------------------------------------------------------------------------------------------------------------------------------------------------------------------------------------------------------------------------------------------------------------------------------------------------------------------------|--------------------------------------------------------------|
| SKZ_0027   | female | C       | EA/TEF, IHPS, thin ear helix, seizures                                                                                                                                                                                                                                                                                                                             | -                                                            |
| SKZ_0096   | male   | C       | EA/TEF, IHPS, syndactyly second-third finger, radial dysplasia, abnormal fibula                                                                                                                                                                                                                                                                                    | VACTERL association                                          |
| SKZ_0244   | male   | C       | EA/TEF, IHPS, anal atresia, intestinal malrotation, sacral dimple, abnormal os coccygis, abnormal vertebrae L1, thenar hypoplasia, both sides hypoplastic "floating" thumbs, both sides dysplastic radii                                                                                                                                                           | VACTERL association, mother is a DES daughter                |
| SKZ_0321   | male   | C       | EA/TEF, IHPS, mild left sided expansion of the pylolocaliceal system, breath holding spells                                                                                                                                                                                                                                                                        | -                                                            |
| SKZ_0353   | female | C       | EA/TEF, IHPS, sacral dimple, thin/slender build, diminished hearing, palpebral fissures slant up, hemolytic anemia, short phalanges                                                                                                                                                                                                                                | Glucose-6-phosphate dehydrogenase deficiency                 |
| SKZ_0399   | male   | C       | EA/TEF, IHPS, anal atresia, sacral dimple, 2 umbilical vessels, posteriorly rotated ears, small ears/microtia, flat face, bifid scrotum, small penis/micropenis, small palmar crease, thick fingers, broad thumbs, proximal placement of thumbs, microstomia, thick broad neck, wide nasal bridge, patent ductus arteriosus, 4 <sup>th</sup> toe abnormally placed | VACTERL association                                          |
| SKZ_0400   | male   | C       | EA/TEF, IHPS, extra ribs, fusion of vertebrae, macrocephaly, bulbar dermoid cyst, auricular tags, short thick/broad neck                                                                                                                                                                                                                                           | Klippel-Feil syndrome                                        |
| SKZ_0683   | male   | C       | EA/TEF, IHPS, sacral dimple                                                                                                                                                                                                                                                                                                                                        | -                                                            |
| SKZ_0760   | male   | C       | EA/TEF, IHPS, hemivertebrae, bitemporal narrowing of the head, prominent forehead, hyper mobile/ extensible fingers, narrow thorax/funnel chest, thin lower and upper lip, spasticity, cerebral palsy                                                                                                                                                              | -                                                            |
| SKZ_0788   | male   | C       | EA/TEF, IHPS, inguinal hernia, jaundice, deafness                                                                                                                                                                                                                                                                                                                  | -                                                            |
| SKZ_0790   | female | C       | EA/TEF, IHPS                                                                                                                                                                                                                                                                                                                                                       | -                                                            |
| SKZ_0796   | male   | C       | EA/TEF, IHPS                                                                                                                                                                                                                                                                                                                                                       | Vanishing twin                                               |
| SKZ_0848   | male   | C       | EA/TEF, IHPS, sacral dimple, hypospadias, patent ductus arteriosus                                                                                                                                                                                                                                                                                                 | -                                                            |
| SKZ_0887   | male   | C       | EA/TEF, IHPS, abnormal sacrum, fusion of vertebrae, posteriorly rotated ears, small mandible/micrognathia, rocker-bottom feet, sandal gap of toes, open mouth appearance, short neck, jaundice                                                                                                                                                                     | -                                                            |
| SKZ_1003   | male   | C       | EA/TEF, IHPS, abnormal sacrum, cleft jaw, cleft palate, cleft upper lip, depressed/flat nasal bridge, fused ribs                                                                                                                                                                                                                                                   | Methyldopa (aldomet) for hypertension during pregnancy       |
| SKZ_1248   | female | C       | EA/TEF, IHPS, small large fontanel, deafness, small ears, auricular tags, single palmar crease, small/hypoplastic deep set ears                                                                                                                                                                                                                                    | -                                                            |
| SKZ_1260   | male   | C       | EA/TEF, IHPS, syndactyly of second-third toe, bifid/fused ribs                                                                                                                                                                                                                                                                                                     | -                                                            |
| SKZ_1353   | male   | C       | EA/TEF, IHPS, cleft uvula, epicanthic folds, abnormal dermatoglypic patterns, hyperconvex/clubbed nails, hypoplastic scrotum, hypospadias, bifid scrotum, hydrocele of testis                                                                                                                                                                                      | -                                                            |
| SKZ_1407   | female | A       | EA, IHPS                                                                                                                                                                                                                                                                                                                                                           | -                                                            |
| SKZ_1472   | male   | C       | EA/TEF, IHPS, eczema of hands with hyperhidrosis, blisters and erythema, Xerosis Cutis                                                                                                                                                                                                                                                                             | Antibiotics for respiratory infection during pregnancy       |
| SKZ_1961   | male   | C       | EA/TEF, IHPS, sacral dimple, mild dysmorphic features, small mouth, pointy ears, long fingers                                                                                                                                                                                                                                                                      | Maternal hypertension                                        |
| SKZ_2013   | male   | A       | EA, IHPS, persistent superior vena cava, scoliosis, Horner's syndrome                                                                                                                                                                                                                                                                                              | -                                                            |
| SKZ_2023   | male   | C       | EA/TEF, IHPS, small chin, sacral dimple                                                                                                                                                                                                                                                                                                                            | -                                                            |
| SKZ_2050   | male   | C       | EA/TEF, IHPS, atrial septum defect                                                                                                                                                                                                                                                                                                                                 | -                                                            |
| SKZ_2082   | male   | C       | EA/TEF, IHPS, persistent tracheolaryngeal cleft, anal atresia, atrial septum defect, tracheal-laryngeal anomaly, prostate fistula                                                                                                                                                                                                                                  | VACTERL association                                          |
| SKZ_2149   | male   | C       | EA/TEF, IHPS                                                                                                                                                                                                                                                                                                                                                       | -                                                            |
| SKZ_2171   | female | C       | EA/TEF, IHPS, spina bifida Th10/11, synostoses vertebrae, hydronephrosis, kyphoscoliosis                                                                                                                                                                                                                                                                           | Unknown medication for headaches and nerves during pregnancy |

916  
917

EA; esophageal atresia, TEF; trachea-esophageal fistula, IHPS; infantile pyloric stenosis, DES; di-ethylstilbestrol. EA-type classification according to Gross classification (Gross, 1947)

918 **Table 3. Results for gene burden analysis**  
 919

| <b>Gene</b>    | <b>Chr.</b> | <b>Start position</b> | <b>rsID</b> | <b>HGVS c</b> | <b>VAAST p-value</b> |
|----------------|-------------|-----------------------|-------------|---------------|----------------------|
| <i>ALMS1</i>   | chr2        | 73828337              | rs201777220 | c.11885T>C    | 1,00E-06             |
| <i>ALMS1</i>   | chr2        | 73746907              |             | c.9543delA    | 1,00E-06             |
| <i>SLC28A3</i> | chr9        | 86895771              | rs762396296 | c.1673dupA    | 0,002853             |
| <i>SLC28A3</i> | chr9        | 86912927              | rs775359011 | c.677G>A      | 0,002853             |
| <i>SP2</i>     | chr17       | 46002296              | rs778698435 | c.1384C>A     | 0,002853             |
| <i>SP2</i>     | chr17       | 45993628              | rs754352270 | c.191C>T      | 0,002853             |
| <i>EPB41</i>   | chr1        | 29435944              |             | c.2410A>G     | 0,019802             |
| <i>EPB41</i>   | chr1        | 29391549              | rs768609152 | c.2063T>G     | 0,019802             |
| <i>AMBRA1</i>  | chr11       | 46563580              | rs755884183 | c.1717C>G     | 0,019802             |
| <i>AMBRA1</i>  | chr11       | 46567274              |             | c.431C>T      | 0,019802             |
| <i>VWA8</i>    | chr13       | 42293773              | rs371770462 | c.3070G>A     | 0,019934             |
| <i>VWA8</i>    | chr13       | 42439870              | rs201163045 | c.1425+2T>C   | 0,019934             |
| <i>CLGN</i>    | chr4        | 141320158             | rs201306926 | c.731A>G      | 0,039604             |
| <i>CLGN</i>    | chr4        | 141315036             | rs200652126 | c.1309G>T     | 0,039604             |
| <i>SDK2</i>    | chr17       | 71357964              | rs147983543 | c.5326G>A     | 0,049505             |
| <i>SDK2</i>    | chr17       | 71415318              |             | c.2173G>A     | 0,049505             |
| <i>PDLIM7</i>  | chr5        | 176911101             | rs200609502 | c.1141A>G     | 0,049505             |
| <i>PDLIM7</i>  | chr5        | 176916502             | rs764108486 | c.761C>T      | 0,049505             |
| <i>GUCY2F</i>  | chrX        | 108652306             | rs7883913   | c.1883G>A     | 0,019802             |
| <i>GUCY2F</i>  | chrX        | 108638614             | rs35726803  | c.2380G>A     | 0,019802             |

920 N/A = not applicable

921

922 **Table 4. Summary of overlapping top candidate genes**

|                                                                                                                                         | EA/IHPS patients (n=15) |        |                     |        | Healthy controls (n=44) |        |                     |        |
|-----------------------------------------------------------------------------------------------------------------------------------------|-------------------------|--------|---------------------|--------|-------------------------|--------|---------------------|--------|
|                                                                                                                                         | Rare (MAF ≤0.001%)      |        | Ultra-rare (MAF 0%) |        | Rare (MAF ≤0.001%)      |        | Ultra-rare (MAF 0%) |        |
|                                                                                                                                         | LB                      | VUS/LD | LB                  | VUS/LD | LB                      | VUS/LD | LB                  | VUS/LD |
| Important in normal foregut development (Fig. 2)                                                                                        | 1                       | 1      | 0                   | 0      | 3                       | 5      | 1                   | 2      |
| Genes associated with genetic syndromes involving both EA and IHPS as variable features (Table 1)                                       | 1                       | 0      | 0                   | 0      | 2                       | 4      | 1                   | 1      |
| Genes associated with IHPS (Peeters et al., 2012)                                                                                       | 0                       | 0      | 0                   | 0      | 0                       | 2      | 0                   | 0      |
| Genes involved in neuromuscular and connective tissue syndromes associated with IHPS (Peeters et al., 2012)                             | 1                       | 1      | 1                   | 0      | 1                       | 2      | 1                   | 0      |
| Genes involved in syndromes and signaling disturbances associated with IHPS (Peeters et al., 2012)                                      | 0                       | 3      | 0                   | 0      | 1                       | 6      | 1                   | 1      |
| Genes involved in ciliopathies and disturbances of gene regulation associated with IHPS (Peeters et al., 2012)                          | 0                       | 1      | 0                   | 0      | 4                       | 2      | 1                   | 0      |
| Genes involved in lymphatic abnormalities and syndromes of environmental and unknown origin associated with IHPS (Peeters et al., 2012) | 0                       | 0      | 0                   | 0      | 1                       | 0      | 0                   | 0      |
| Genes involved in genetic syndromes and abnormalities                                                                                   | 1                       | 1      | 1                   | 1      | 6                       | 6      | 0                   | 1      |

923 Variant allele count per gene. LB = likely benign, VUS = variant of unknown significance, LD = likely deleterious.  
 924 See Table S6 for the complete results, adapted from Peeters et al. en Brosens et al. (Peeters et al., 2012, Brosens et  
 925 al., 2014).

926  
 927  
 928 **Table 5. Comparison with control cohort: number of variants**  
 929

|                              | Ultra-rare variants (MAF 0%) |       |                         |       | Rare variants (MAF ≤0.001%) |      |                         |       |
|------------------------------|------------------------------|-------|-------------------------|-------|-----------------------------|------|-------------------------|-------|
|                              | EA/IHPS patients (n=15)      |       | Healthy controls (n=44) |       | EA/IHPS patients (n=15)     |      | Healthy controls (n=44) |       |
|                              | #                            |       | #                       |       | #                           |      | #                       |       |
| <b>Putative deleterious</b>  | 296                          | 19.73 | 725                     | 16.48 | 912                         | 60.8 | 2667                    | 60.6  |
| <b>LOF intolerant</b>        | 28                           | 1.87  | 85                      | 1.93  | 81                          | 5.4  | 272                     | 6.2   |
| <b>De novo variants</b>      | 0                            | -     | Unknown                 | -     | 0                           | -    | Unknown                 | -     |
| <b>Recessive</b>             | 291                          | 19.4  | 715                     | 16.25 | 898                         | 59.9 | 2631                    | 59.80 |
| <b>Compound heterozygous</b> | 3                            | 0.2   | 3                       | 0.06  | 8                           | 0.53 | 6                       | 0.14  |
| <b>X-linked</b>              | 11                           | 0.73  | 23                      | 0.52  | 28                          | 1.87 | 95                      | 2.16  |

930 # = number of variants divided by the number of patients. A Chi<sup>2</sup> test showed no significant  
 931 differences between the patients and the healthy controls (all p>0.05)  
 932
